# Sleep spindles coordinate corticostriatal reactivations during the emergence of automaticity

S. M. Lemke<sup>1,2,3</sup>, D. S. Ramanathan<sup>4,5</sup>, D. Darevsky<sup>2,3</sup>, D. Egert<sup>2</sup>, J. D. Berke<sup>2,6</sup>, K. Ganguly<sup>2,3\*</sup>

<sup>1</sup>Neuroscience Graduate Program, University of California, San Francisco, USA

<sup>2</sup>Department of Neurology, University of California, San Francisco, USA

<sup>3</sup>Neurology Service, San Francisco Veterans Affairs Medical Center, CA, USA

<sup>4</sup>Department of Psychiatry, University of California, San Diego, USA

<sup>5</sup>Psychiatry Service, San Diego Veterans Affairs Medical Center, CA, USA

<sup>6</sup>Weill Institute for Neurosciences and Kavli Institute for Fundamental Neuroscience, University of California, San Francisco, USA

1 **Plasticity within the corticostriatal network is known to regulate the balance between**  
2 **behavioral flexibility and automaticity. Repeated training of an action has been shown to**  
3 **bias behavior towards automaticity, suggesting that training may trigger activity-dependent**  
4 **corticostriatal plasticity. However, surprisingly little is known about the natural activity**  
5 **patterns that may drive plasticity or when they occur during long-term training. Here we**  
6 **chronically monitored neural activity from primary motor cortex (M1) and the dorsolateral**  
7 **striatum (DLS) during both training and offline periods, i.e., time away from training**  
8 **including sleep, throughout the development of an automatic reaching action. We first show**  
9 **that blocking striatal NMDA receptors during offline periods prevents the emergence of**  
10 **behavioral consistency, a hallmark of automaticity. We then show that, throughout the**  
11 **development of an automatic reaching action, corticostriatal functional connectivity**  
12 **increases during offline periods. Such increases track the emergence of consistent behavior**  
13 **and predictable cross-area neural dynamics. We then identify sleep spindles during non-**  
14 **REM sleep (NREM) as uniquely poised to mediate corticostriatal plasticity during offline**  
15 **periods. We show that sleep spindles are periods of maximal corticostriatal transmission**  
16 **within offline periods, that sleep spindles in post-training NREM reactivate neurons across**  
17 **areas, and that sleep-spindle modulation in post-training NREM is linked to observable**  
18 **changes in spiking relationships between individual pairs of M1 and DLS neurons. Our**  
19 **results indicate that offline periods, in general, and sleep spindles, specifically, play an**  
20 **important role in regulating behavioral flexibility through corticostriatal network plasticity.**

## 21 Introduction

22

23 Automaticity allows animals to capitalize on invariance in the environment through the  
24 development of actions that, while inflexible to changes, are performed highly consistently in  
25 response to a specific stimulus<sup>1-5</sup>. It has been demonstrated that the consistent production of an  
26 action emerges with repeated training over multiple days and is accompanied by coordinated  
27 neural activity across the corticostriatal network during action execution<sup>6-10</sup>. Importantly, the  
28 emergence of such actions has also been shown to require striatal NMDA receptor activation<sup>10-12</sup>,  
29 suggesting that cortical activity patterns that modulate the striatum may be important drivers of  
30 activity-dependent plasticity<sup>13,14</sup> and the emergence of coordinated corticostriatal activity.  
31 However, surprisingly little is known about the natural activity patterns related to repeated task  
32 training that underlie the emergence of automaticity.

33

34 One intriguing possibility is that time away from training - “offline” periods, including sleep - may  
35 play a role in modifying the corticostriatal network. This possibility is motivated by evidence that  
36 sleep-dependent reactivations of cortical neural ensembles active during task performance are  
37 essential for initial learning<sup>15-18</sup>. It is possible that the coordinated reactivations of both cortical  
38 and striatal ensembles modify the corticostriatal network and impact behavior during long-term  
39 training<sup>19-22</sup>. However, how cortical reactivation events engage downstream striatal ensembles  
40 remains unclear. Moreover, how such cross-area activity may precisely modify the corticostriatal  
41 network and impact network activity during subsequent awake behavior is unexplored.

42

43 Currently, our understanding of how sleep impacts distributed brain networks is largely derived  
44 from the *systems consolidation theory*, where it has been shown that coordinated activity patterns  
45 across hippocampus and cortex lead to the formation of stable long-term memories in cortex that  
46 do not require the hippocampus<sup>23-25</sup>. Notably, whether sleep impacts the connectivity across  
47 hippocampus and cortex has not been established. Therefore, one possibility is that, in the  
48 corticostriatal network, we similarly observe coordinated cross-area activity patterns during sleep  
49 but do not find evidence for the modification of corticostriatal connectivity during offline periods.  
50 Alternatively, it is possible that we find evidence that cross-area activity patterns during sleep  
51 modify the connectivity between cortex and striatum and impact network activity during  
52 subsequent behavior.

53

54 Here we establish that offline periods play an essential role in modifying the corticostriatal network  
55 during the emergence of automaticity and identify sleep spindles as uniquely poised to mediate  
56 such plasticity. We show that during post-training NREM, sleep-dependent reactivation events are  
57 coordinated across both cortex and striatum during sleep spindles and link such spindle-  
58 modulation to changes in functional connectivity across the corticostriatal network. These results  
59 suggest that sleep plays an important role in modifying cross-area connectivity within offline  
60 periods and that the modulation of activity patterns during sleep may offer novel therapeutic targets  
61 for unlearning maladaptive habits<sup>26,27</sup>.

62

## 63 Results

64

65 To study how corticostriatal network activity evolves during long-term training, we implanted six  
66 adult rats with either microwire electrode arrays ( $n = 4$ ) or custom built high-density silicon

67 probes<sup>28</sup> ( $n = 2$ ) in both primary motor cortex (M1) and the dorsolateral striatum (DLS), which  
68 receives the majority of M1 projections to the striatum<sup>29</sup> (**Figure 1a**). Neural activity across  
69 regions was monitored as rats underwent ~eight days of reach-to-grasp task training (range: 5-14  
70 days, mean: 8.67 days). Each recording day consisted of a 2-3 hour pre-training block (“pre-  
71 sleep”), a 100-150 trial training block, and a second 2-3 hour post-training block (“post-sleep”;  
72 **Figure 1b**; pre-sleep length:  $157.2 \pm 5.8$  minutes, post-sleep length:  $166.6 \pm 6.3$  minutes, mean  $\pm$   
73 SEM). The reach-to-grasp task requires rats to reach and grasp a food pellet through a small  
74 window present in their behavioral box. During pre- and post-sleep, behavioral states, i.e., wake,  
75 non-REM sleep (NREM), and REM sleep, were classified using standard methods based on  
76 cortical local field potential (LFP) power and movement measured from video or  
77 electromyography (EMG) activity<sup>30</sup>.

78

### 79 **Offline striatal NMDA receptor activation is required to develop a consistent behavior**

80

81 With repeated training on the reach-to-grasp task, animals developed a consistent reaching  
82 trajectory (**Figure 1c**) and reaching velocity profile (**Figure 1d**). Measuring the correlation  
83 between the mean reaching velocity profile on each day of training and the final day of training  
84 revealed that a consistent day-to-day reaching action emerged within the first eight days of training  
85 (**Figure 1e**). Such day-to-day invariance in skilled reaching is consistent with the emergence of  
86 automaticity<sup>1-3,31</sup>. To further test the automaticity of reaching after the emergence of invariant  
87 behavior, we moved the location of the food pellet such that reaches to the old pellet location  
88 would no longer be successful. If an animal were reaching flexibly, we would expect that reaching  
89 behavior would quickly adapt to the new position. Alternatively, if an animal were reaching  
90 automatically, we would expect that reaches would remain consistent despite decreased success.  
91 Consistent with automaticity, reach trajectories remained consistent and did not adapt to the new  
92 pellet position despite a large decrease in success rate (**Supplemental Figure 1**). We also  
93 examined whether such automaticity emerged with long-term training or existed at the start of  
94 training by testing whether animals could reach flexibility during the first two days of exposure to  
95 the task ( $n = 2$  rats with no neural implant). These animals were able to reach to each of the two  
96 different pellet positions with comparable success rates (animal 1: 43% and 72% success rate;  
97 animals 2: 44% and 50% success rate, ~200 trials in each animal), indicating that their reaching  
98 behavior was flexible prior to repeated training. Altogether this indicated that our training  
99 paradigm led to the formation of inflexible and automatic reach-to-grasp behavior.

100

101 To further test the link between offline plasticity in the corticostriatal network and increases in  
102 behavioral consistency, we trained a new cohort of animals ( $n = 6$  rats) and infused 1 $\mu$ l of either  
103 NMDA receptor antagonist AP5 (5 $\mu$ g/ $\mu$ l) or saline into DLS immediately after training on each  
104 day (**Figure 1f**). This revealed that offline striatal NMDA activation was essential for the  
105 emergence of a consistent reaching behavior, as day-to-day changes in reach consistency were  
106 significantly decreased with AP5 infusions, compared to saline infusions or day-to-day  
107 improvements observed in the learning cohort (**Figure 1g**;  $n = 24$  correlation change values with  
108 AP5 infusions,  $-0.03 \pm 0.03$  correlation value,  $n = 24$  correlation change values with saline  
109 infusions,  $0.07 \pm 0.02$  correlation value,  $n = 40$  correlation change values in learning cohort,  $0.04$   
110  $\pm 0.01$  correlation value; AP5 infusions vs. saline infusions:  $t(23) = 2.8$ ,  $P = 8 \times 10^{-3}$ , paired-sample  
111 t-test, AP5 infusions vs. learning cohort:  $t(62) = 2.3$ ,  $P = 0.03$ , two-sample t-test, saline infusions  
112 vs. learning cohort:  $t(62) = 1.3$ ,  $P = 0.20$ , two-sample t-test). Importantly, task engagement, as

113 measured by reaction time from trial start to reach, did not differ for trials on subsequent days after  
114 AP5 or saline infusions (AP5:  $218.2 \pm 3.2\text{ms}$ , saline:  $222.4 \pm 3.0\text{ms}$ ,  $t(5198) = -0.96$ ,  $P = 0.34$ ,  
115 two-sample t-test). Altogether, these results were consistent with the notion that offline plasticity  
116 in the corticostriatal network following training is critical for the emergence of automaticity.

117

### 118 **Corticostriatal functional connectivity increases during offline periods**

119

120 To measure long-term changes in corticostriatal functional connectivity during the emergence of  
121 automaticity, we measured LFP coherence across individual pairs of M1 and DLS electrodes. LFP  
122 signals can be stably recorded across multiple days allowing LFP coherence to provide a stable  
123 long-term measure of multi-region connectivity<sup>32,33</sup>. Specifically, within the corticostriatal  
124 network, theta coherence (4-8Hz) has been previously shown to reflect coordinated population  
125 spiking activity<sup>8,9,34</sup>. Therefore, we measured 4-8Hz LFP coherence during pre- and post-sleep on  
126 each day of training to determine when corticostriatal functional connectivity changed during long-  
127 term training (**Figure 2a**). LFP coherence was calculated specifically during NREM to control for  
128 any differences in the time spent in each behavioral state during pre- and post-sleep. Common-  
129 mode referencing was applied, separately in each region, to decrease common noise and minimize  
130 volume conduction<sup>8</sup>. We found that there was a significant correlation between each day's mean  
131 4-8Hz LFP coherence across all channel pairs and reach velocity profile correlation ( $r = 0.44$ ,  $P =$   
132  $7 \times 10^{-3}$ , Pearson's  $r$ ), indicating that offline LFP coherence reflects changes in corticostriatal  
133 functional connectivity that are related to the emergence of a consistent behavior.

134

135 We next sought to determine whether LFP coherence increased during training or offline periods.  
136 To do this, we specifically examined LFP channel pairs that increased in coherence from day one  
137 to day eight (33% of pairs increased, 17% decreased, and 50% did not change; increase or decrease  
138 defined as a change in coherence of at least 0.25). Remarkably, within the subset of channels that  
139 showed training-related increases in coherence over learning, increases occurred largely offline,  
140 i.e., between each day's post-sleep and the next day's pre-sleep, rather than online during training,  
141 i.e., between pre- and post-sleep on the same day (**Figure 2b&c**). More specifically, the  
142 distribution of online LFP coherence changes was not significantly different than zero, while the  
143 distribution of offline LFP coherence changes was skewed toward larger increases (**Figure 2d**;  
144 online LFP coherence changes:  $t(422) = 1.2$ ,  $P = 0.23$ , offline LFP coherence changes:  $t(422) =$   
145  $18.8$ ,  $P = 5 \times 10^{-57}$ , one-sample t-test). Importantly, the subset of channels that showed training-  
146 related increases had a close relationship to the emergence of consistent behavior (**Figure 2e**;  $r =$   
147  $0.73$ ,  $P = 4 \times 10^{-7}$ , Pearson's  $r$ ), providing evidence that offline increases in corticostriatal  
148 functional connectivity are relevant to the consistency of behavior during the emergence of  
149 automaticity.

150

### 151 **Offline increases in functional connectivity predict the emergence of low-dimensional cross- 152 area neural dynamics during behavior**

153

154 We next examined how offline increases in corticostriatal functional connectivity may impact  
155 corticostriatal network activity during subsequent reach-to-grasp performance. We extracted low-  
156 dimensional neural trajectory representations of DLS spiking activity during reaching using  
157 principle components analysis (PCA). We then examined the evolution of how spiking activity in  
158 M1 could predict DLS neural trajectories over the course of training (**Figure 3a**). We found that

159 the ability to predict DLS neural trajectories during reaching from M1 spiking activity increased  
160 with training, while the ability to predict the trajectory representations of DLS activity during a  
161 baseline, non-reaching, period did not significantly change (**Figure 3b**; reach activity: first two  
162 days of training:  $0.15 \pm 0.05$  Pearson's  $r$ , last two days of training:  $0.46 \pm 0.05$  Pearson's  $r$ ,  $t(30)$   
163  $= -4.4$ ,  $P = 1 \times 10^{-4}$ , two-sample t-test; baseline activity: first two days of training:  $0.03 \pm 0.02$   
164 Pearson's  $r$ , last two days of training:  $0.01 \pm 0.03$  Pearson's  $r$ ,  $t(30) = 1.0$ ,  $P = 0.30$ , two-sample  
165 t-test). Notably, the ability to predict DLS neural trajectories during reaching from M1 spiking  
166 activity was significantly correlated to the mean 4-8Hz LFP coherence measured offline on each  
167 day of training (**Figure 3c**), indicating that offline increases in LFP coherence track the emergence  
168 of predictable cross-area dynamics during subsequent reach-to-grasp performance.

### 169 170 **Corticostriatal transmission strength within offline periods is maximal during sleep spindles** 171 **in NREM**

172  
173 Given the evidence that offline periods are relevant for changes in corticostriatal functional  
174 connectivity, we next sought to identify the activity patterns that may be responsible for driving  
175 such plasticity across M1 and DLS. To do this, we first examined how corticostriatal transmission  
176 strength, i.e., the degree to which M1 neural activity drives DLS activity, differed across  
177 behavioral states during offline periods (**Figure 4a**). To measure this, we characterized putative  
178 monosynaptically connected pairs of M1 and DLS units ( $n = 1,100$  M1 and  $579$  DLS units) by  
179 determining whether there was a significant peak in the cross correlation of their spiking activity  
180 at the short-latency time lag consistent with the conduction and synaptic delays between M1 and  
181 DLS (~6ms time lag from M1 to DLS activity<sup>9</sup>; **Figure 4b**;  $3,969/10,286$  M1 and DLS unit pairs  
182 were classified as putatively connected; **Supplemental Figure 2a&b**). We then compared the  
183 short-latency cross correlation magnitude (1-10ms time lag) for the population of putatively  
184 connected M1 and DLS pairs across behavioral states. To account for differences in firing rates  
185 across behavioral states (**Supplemental Figure 2c&d**), we normalized each pair's cross  
186 correlation by the mean cross correlation value from 50-100ms time lag, where no consistent  
187 spiking relationship is expected between putatively connected pairs of M1 and DLS units. This  
188 revealed that corticostriatal transmission strength was maximal during NREM, compared to REM  
189 or wake (**Figure 4c & Supplemental Figure 3a&b**).

190  
191 Given the heterogeneous nature of NREM activity, we next explored the dynamics of  
192 corticostriatal transmission within NREM. We specifically detected NREM rhythms in M1 that  
193 have been previously related to activity-dependent plasticity in cortex, i.e., sleep spindles, slow  
194 oscillations, and delta waves<sup>18,35-37</sup>, and examined whether activity in DLS was also modulated  
195 during these rhythms (**Figure 4d**). We found that both LFP signals and spiking in DLS were  
196 significantly modulated during slow oscillations, delta waves, and sleep spindles detected in M1  
197 (**Figure 4e&f; Supplemental Figure 4**). To compare corticostriatal transmission strength during  
198 these rhythms, we measured the short-latency cross correlation magnitude for the population of  
199 putatively connected M1 and DLS pairs using the spiking activity during each sleep rhythm.  
200 Importantly, we applied a previously established normalization method to isolate and subtract off  
201 the influence of firing rate changes or LFP phase-locking differences across NREM rhythms on  
202 cross correlations<sup>38</sup>. This revealed that sleep spindles were unique periods of boosted corticostriatal  
203 transmission strength, compared to slow oscillations or delta waves (**Figure 4g & Supplemental**  
204 **Figure 3c&d**). Altogether, this indicated that sleep spindles during NREM may be particularly

205 relevant periods for activity-dependent plasticity within the corticostriatal network, given the high  
206 transmission of activity from M1 to DLS.

207

### 208 **Striatal reactivations during sleep spindles reflect cortical input**

209

210 We next assessed whether sleep spindles, or other NREM rhythms, were significant predictors of  
211 day-to-day changes in behavioral consistency. We found that sleep spindle density (events/minute)  
212 during post-sleep, but not pre-sleep, was a significant predictor of day-to-day changes in reaching  
213 consistency (pre-sleep sleep spindles:  $r = 0.07$ ,  $P = 0.70$ , post-sleep sleep spindles:  $r = 0.38$ ,  $P =$   
214  $0.01$ , Pearson's  $r$ ). Neither delta waves nor slow oscillations were significantly predictive of day-  
215 to-day changes in reaching consistency (pre-sleep delta waves:  $r = 0.02$ ,  $P = 0.87$ , post-sleep delta  
216 waves:  $r = 0.03$ ,  $P = 0.83$ , pre-sleep slow oscillations:  $r = -0.11$ ,  $P = 0.51$ , post-sleep slow  
217 oscillations:  $r = -0.08$ ,  $P = 0.60$ , Pearson's  $r$ ). Given the evidence that corticostriatal transmission  
218 is boosted during sleep spindles, a possible explanation for the unique relationship between post-  
219 training sleep spindle density and day-to-day increases in behavioral consistency is that sleep  
220 spindles drive activity-dependent corticostriatal plasticity that impacts behavior. If this were the  
221 case, we would expect relevant M1 and DLS neural populations to be preferentially engaged  
222 during sleep spindles after training. In fact, we found that reach modulated (RM) M1 units,  
223 characterized by a significant modulation of activity during the reaching action, were significantly  
224 more modulated during sleep spindles after training, while non-RM M1 units did not significantly  
225 change in modulation from pre- to post-sleep (**Figure 5a&b**; RM M1 units:  $P = 0.02$ , non-RM M1  
226 units:  $P = 0.75$ , two-sample Kolmogorov–Smirnov test between distributions from pre- and post-  
227 sleep, followed by a shift test to assess how quartiles of the distributions differed;  $P$  values for the  
228 rest of Figure 3 reflect these statistical tests).

229

230 How does this then affect downstream neural activity during sleep spindles in DLS? Surprisingly,  
231 both RM and non-RM DLS unit populations were significantly more modulated during sleep  
232 spindles after training (**Figure 5c&d**; RM DLS units:  $P = 8 \times 10^{-3}$ , non-RM DLS units:  $P = 2 \times 10^{-$   
233  $3$ ). One possibility is that this occurs because DLS activity during sleep spindles is driven by M1  
234 input, rather than strictly reflecting reach modulation, as is the case for M1 neurons. Consistent  
235 with this, we were able to separate DLS unit populations that increased or did not increase in sleep  
236 spindle modulation after training based on putative connectivity with M1 units (**Figure 5e&f**; RM  
237 DLS units with strong RM M1 input:  $P = 1 \times 10^{-3}$ , RM DLS units with weak or no RM M1 input:  
238  $P = 0.82$ , non-RM DLS units with strong RM M1 input:  $P = 3 \times 10^{-3}$ , non-RM DLS units with weak  
239 or no RM M1 input:  $P = 0.24$ ; strong RM M1 input was defined as putative connectivity with three  
240 or more RM M1 units). In contrast, DLS units did not increase in modulation during either delta  
241 waves (**Supplemental Figure 5**) or slow oscillations (**Supplemental Figure 6**) after training.  
242 Altogether, this suggests that, while reactivations during sleep spindles reflect task modulation in  
243 M1, DLS reactivations reflect cortical input, suggesting a potential role for sleep spindles in  
244 reinforcing task-related corticostriatal connectivity, including novel connectivity such as  
245 projections from RM M1 units to previously non-RM DLS units.

246

### 247 **Sleep spindle modulation predicts offline changes in corticostriatal transmission strength**

248

249 We next sought to directly examine whether sleep spindle modulation following training was  
250 related to modifications of the corticostriatal network within offline periods. To measure

251 modifications of the corticostriatal network during offline periods, we calculated cross correlations  
252 of spiking activity across individual pairs of M1 and DLS units during the first and second half of  
253 each pre- and post-sleep period (**Figure 6a-c**). Cross correlations were generated specifically with  
254 spiking activity during NREM to control for any differences in time spent in each behavioral state.  
255 Consistent changes in the short-latency cross correlation magnitude from the first to second half  
256 of pre- or post-sleep would indicate a modification of corticostriatal transmission strength within  
257 the offline period. Given the evidence of reactivation during sleep spindles between RM M1 and  
258 putatively connected DLS units, we first specifically examined transmission strength changes  
259 within the pairs in this population that were significantly modulated to spindles (708/3,969 pairs  
260 in pre-sleep and 1,062/3,969 pairs in post-sleep). Strikingly, we observed an increase in  
261 corticostriatal transmission strength during post-sleep, but no significant change during pre-sleep  
262 (**Figure 6d&e**; pre-sleep: one-sample t-test:  $t(707) = -0.9$ ,  $P = 0.37$ ; post-sleep: one-sample t-test:  
263  $t(1061) = 10.8$ ,  $P = 6 \times 10^{-26}$ ). Furthermore, increases in corticostriatal transmission strength across  
264 individual pairs of M1 and DLS units during post-sleep, but not pre-sleep, were correlated to the  
265 mean sleep spindle modulation of that pair (**Figure 6f&g**). Importantly, the amount of time spent  
266 in NREM was similar during pre- and post-sleep (**Supplemental Figure 7**). In contrast,  
267 transmission strength across RM M1 and putatively connected DLS unit pairs that were not  
268 significantly modulated to sleep spindles (1,164/3,969 pairs in pre-sleep and 989/3,967 pairs in  
269 post-sleep) did not change during either pre- or post-sleep and, within this population, changes in  
270 corticostriatal transmission strength across individual pairs of M1 and DLS units were not  
271 significantly correlated to the mean sleep spindle modulation of that pair (**Supplemental Figure**  
272 **8**). These results suggested that, following training, offline corticostriatal transmission strength  
273 changes are linked to sleep spindle modulation.

### 274 275 **The interaction between sleep spindles and slow oscillations impact the role of sleep spindles** 276 **within the corticostriatal network**

277  
278 To understand why changes in corticostriatal transmission strength occurred specifically in post-  
279 sleep, but not pre-sleep, we examined the interaction between sleep spindles and slow oscillations,  
280 a relationship known to be relevant for sleep-dependent processing<sup>18,38,39</sup>. We found that the  
281 distribution of temporal proximity to preceding slow oscillations in post-sleep significantly  
282 differed from the distribution in pre-sleep, with slow oscillations in closer proximity to sleep  
283 spindles during post-sleep (**Figure 7a**;  $P = 2 \times 10^{-29}$ , two-sample Kolmogorov–Smirnov test). We  
284 found that this close proximity of slow oscillations to sleep spindles increased firing rates during  
285 sleep spindles in both M1 and DLS (**Figure 7b&c**, M1 units:  $P = 0.02$ , DLS units:  $P = 0.02$ , two-  
286 sample Kolmogorov–Smirnov tests, followed by a shift test to assess how quartiles of the  
287 distribution differed). Notably, the rate of sleep spindles within 500ms after a slow oscillation was  
288 correlated to the mean change in corticostriatal transmission strength across all pairs of M1 and  
289 DLS units during post-sleep (**Figure 7d**). This suggested that proximity to slow oscillations may  
290 be an important factor in whether sleep spindles drive plasticity. Altogether, our results provide  
291 evidence for offline plasticity within the corticostriatal network after training and that sleep  
292 spindles, and their interactions with slow oscillations, are important mediators of such plasticity.

## 293 Discussion

294

295 Skilled behaviors exist in a continuum between being flexible - adapting quickly to changes in the  
296 environment - and automatic - inflexible to changes but cognitively efficient<sup>1-4</sup>. Plasticity within  
297 the corticostriatal network is thought to regulate the balance between flexibility and  
298 automaticity<sup>4,5,26</sup>. In this study, we study long-term training that resulted in automaticity, as  
299 evidenced by day-to-day invariance in reaching behavior that persisted even when the food pellet  
300 was moved such that reaches were no longer successful in retrieving the pellet. We show that,  
301 during such long-term training, corticostriatal functional connectivity increased during offline  
302 periods and provide evidence that sleep spindles uniquely engage the corticostriatal network to  
303 mediate such plasticity.

304

305 Our results provide evidence that sleep plays an important role in modifying cross-area  
306 connectivity during learning. While coordinated cross-area reactivations during sleep have been  
307 reported across several brain networks<sup>19,40-45</sup>, how such coordinated activity patterns precisely  
308 shape the connectivity across brain regions remains largely unexplored (but see<sup>19</sup>). For example,  
309 studies informing the *systems consolidation theory* have posited that coordinated activity patterns  
310 across the hippocampus and cortex during sleep drive intra-cortical plasticity<sup>23,25,46</sup>. However, it is  
311 not known whether sleep impacts hippocampal-cortical connectivity, despite evidence for a change  
312 in hippocampal-cortical coupling after learning<sup>47</sup>. Our results thus suggest that the *systems*  
313 *consolidation theory* may need to be broadened to consider a role for sleep in increasing the  
314 coupling between connected regions that can impact subsequent wake network activity and  
315 behavior. As evidence for cross-area reactivations in different brain networks continues to grow<sup>48</sup>,  
316 it will be important to consider how such activity patterns may impact both local and cross-area  
317 plasticity.

318

319 Our measures of cross-area connectivity are based on the coordination of LFP signals and single  
320 unit spike timing across M1 and DLS. We observed a subset of both LFP electrodes and  
321 corticostriatal neuron pairs showing evidence of increased connectivity with training, indicating  
322 the selective strengthening of corticostriatal connectivity - but what is the neural basis for these  
323 changes? One possibility is that our functional measures of connectivity reflect changes in synaptic  
324 strength of M1 projections to the DLS. This is consistent with evidence for the strengthening of  
325 cortical inputs to the striatum with motor training<sup>49</sup>. An alternative possibility is that coordinated  
326 inputs to both M1 and DLS drive increased functional connectivity. We believe our results are  
327 most consistent with a physical change in synaptic strength, as we observed evidence of increased  
328 cross-area connectivity in two distinct states, NREM, reflected as increased LFP coherence, and  
329 awake task performance, reflected in the emergence of predictable cross-area dynamics. Future  
330 work is required to determine whether our observations are consistent with structural changes in  
331 synaptic strength.

332

333 We also provide evidence that sleep spindles are uniquely poised to mediate the enhancement of  
334 corticostriatal coupling during the offline period following training. While sleep spindles have  
335 been previously suggested to be important for plasticity<sup>36,50</sup>, the precise link between sleep  
336 spindles, plasticity, and behavior has remained unclear. Here we also show that striatal NMDA  
337 activation during the offline periods following training is required for increases in behavioral  
338 consistency. This suggests that sleep spindles may be important drivers of corticostriatal plasticity



339 through NMDA activation. This is consistent with work showing that corticostriatal plasticity is  
340 NMDA-dependent<sup>13,14</sup>, as well as *in vitro* work examining how sleep spindle activity patterns  
341 might drive plasticity<sup>50</sup>. Additionally, we provide evidence that the proximity of sleep spindles to  
342 preceding slow oscillations is an important regulator of plasticity, consistent with previous  
343 work<sup>18,39</sup>. As slow oscillations have been linked to NMDA receptor activation<sup>51</sup>, one intriguing  
344 possibility is that slow oscillations gate sleep spindle plasticity through the activation of NMDA  
345 receptors.

346  
347 Our results link offline corticostriatal plasticity to the emergence of predictable low-dimensional  
348 cross-area activity. It has been previously demonstrated that M1 exhibits consistent low-  
349 dimensional population neural dynamics during consistently produced motor actions<sup>52</sup>. There is  
350 also growing evidence that subcortical regions such as the DLS are important for stabilizing  
351 cortical activity patterns and the emergence of consistent behaviors<sup>8,12</sup>. Consistent with this idea,  
352 task-related coordination of M1 and DLS activity emerges with skill acquisition<sup>8-10</sup>. Here we link  
353 offline increases in corticostriatal functional connectivity to the ability to predict low-dimensional  
354 population activity in DLS from M1 activity. This suggests a model in which consistent low-  
355 dimensional neural dynamics emerge across the motor network with training and that motor  
356 network plasticity during offline periods is important for the emergence of such consistent cross-  
357 area dynamics.

358  
359 Lastly, we link offline corticostriatal plasticity in the corticostriatal network to the emergence of  
360 fast and consistent reaching behavior, reflected in the invariance of day-to-day reaching velocity  
361 profile. This is consistent with a range of studies demonstrating that sleep benefits speed and  
362 consistency in motor tasks in humans<sup>53,54</sup> and rodents<sup>37,55</sup>, as well as rodent brain-machine  
363 interface (BMI) tasks<sup>17,18</sup>. Therefore, our results suggest the possibility that a fundamental role of  
364 sleep is to modify the corticostriatal network to impact the consistency of behavior in a range of  
365 tasks. Further work is required to determine the precise role of offline corticostriatal plasticity in  
366 different contexts. One important avenue of research is to explore whether sleep can impact  
367 corticostriatal connectivity in the context of maladaptive automatic behaviors, such as addiction,  
368 that have been linked to the corticostriatal network<sup>26,56</sup>. Notably, there is evidence that the  
369 reactivation of a stored memory can make the memory temporarily labile<sup>27</sup> and recent work has  
370 shown that the modulation of NREM rhythms can regulate modulate memory consolidation vs.  
371 forgetting<sup>18</sup>. Therefore, it will be informative to determine whether similar manipulations could be  
372 used in the context of maladaptive automatic behaviors to provide a therapeutic benefit.

## References

1. Isoda, M. & Hikosaka, O. Cortico-basal ganglia mechanisms for overcoming innate, habitual and motivational behaviors. *Eur. J. Neurosci.* **33**, 2058–2069 (2011).
2. Smith, K. S. & Graybiel, A. M. Habit formation. *Dialogues Clin. Neurosci.* **18**, 33–43 (2016).
3. Robbins, T. W. & Costa, R. M. Habits. *Current Biology* (2017). doi:10.1016/j.cub.2017.09.060
4. Graybiel, A. M. Habits, Rituals, and the Evaluative Brain. *Annu. Rev. Neurosci.* **31**, 359–387 (2008).
5. Yin, H. H. & Knowlton, B. J. The role of the basal ganglia in habit formation. *Nat. Rev. Neurosci.* **7**, 464–476 (2006).
6. Costa, R. M., Cohen, D. & Nicolelis, M. A. L. Differential Corticostriatal Plasticity during Fast and Slow Motor Skill Learning in Mice. *Curr. Biol.* **14**, 1124–1134 (2004).
7. Neely, R. M., Koralek, A. C., Athalye, V. R., Costa, R. M. & Carmena, J. M. Volitional Modulation of Primary Visual Cortex Activity Requires the Basal Ganglia. *Neuron* **0**, (2018).
8. Lemke, S. M., Ramanathan, D. S., Guo, L., Won, S. J. & Ganguly, K. Emergent modular neural control drives coordinated motor actions. *Nat. Neurosci.* **22**, 1122–1131 (2019).
9. Koralek, A. C., Costa, R. M. & Carmena, J. M. Temporally Precise Cell-Specific Coherence Develops in Corticostriatal Networks during Learning. *Neuron* **79**, 865–872 (2013).
10. Santos, F. J., Oliveira, R. F., Jin, X. & Costa, R. M. Corticostriatal dynamics encode the refinement of specific behavioral variability during skill learning. *Elife* **4**, (2015).
11. Dang, M. T. *et al.* Disrupted motor learning and long-term synaptic plasticity in mice lacking NMDAR1 in the striatum. *Proc. Natl. Acad. Sci. U. S. A.* (2006). doi:10.1073/pnas.0601758103
12. Koralek, A. C., Jin, X., Long II, J. D., Costa, R. M. & Carmena, J. M. Corticostriatal plasticity is necessary for learning intentional neuroprosthetic skills. *Nature* **483**, 331–335 (2012).
13. Calabresi, P., Pisani, A., Mercuri, N. B. & Bernardi, G. Long-term Potentiation in the Striatum is Unmasked by Removing the Voltage-dependent Magnesium Block of NMDA Receptor Channels. *Eur. J. Neurosci.* (1992). doi:10.1111/j.1460-9568.1992.tb00119.x
14. Charpier, S. & Deniau, J. M. In vivo activity-dependent plasticity at cortico-striatal connections: Evidence for physiological long-term potentiation. *Proc. Natl. Acad. Sci. U. S. A.* (1997). doi:10.1073/pnas.94.13.7036
15. Yang, G. *et al.* Sleep promotes branch-specific formation of dendritic spines after learning. *Science (80-. )*. **344**, 1173–1178 (2014).
16. Ramanathan, D. S., Gulati, T. & Ganguly, K. Sleep-Dependent Reactivation of Ensembles in Motor Cortex Promotes Skill Consolidation. *PLOS Biol.* **13**, e1002263 (2015).
17. Gulati, T., Ramanathan, D. S., Wong, C. C. & Ganguly, K. Reactivation of emergent task-related ensembles during slow-wave sleep after neuroprosthetic learning. *Nat. Neurosci.* **17**, 1107–1113 (2014).
18. Kim, J., Gulati, T. & Ganguly, K. Competing Roles of Slow Oscillations and Delta Waves in Memory Consolidation versus Forgetting. *Cell* **179**, 514–526.e13 (2019).
19. Vahdat, S., Fogel, S., Benali, H. & Doyon, J. Network-wide reorganization of procedural memory during NREM sleep revealed by fMRI. *Elife* **6**, (2017).

20. Boutin, A. *et al.* Transient synchronization of hippocampo-striato-thalamo-cortical networks during sleep spindle oscillations induces motor memory consolidation. *Neuroimage* **169**, 419–430 (2018).
21. Doyon, J., Gabbitov, E., Vahdat, S., Lungu, O. & Boutin, A. Current issues related to motor sequence learning in humans. *Curr. Opin. Behav. Sci.* **20**, 89–97 (2018).
22. Doyon, J. & Benali, H. Reorganization and plasticity in the adult brain during learning of motor skills. *Curr. Opin. Neurobiol.* **15**, 161–167 (2005).
23. Klinzing, J. G., Niethard, N. & Born, J. Mechanisms of systems memory consolidation during sleep. *Nat. Neurosci.* **22**, 1598–1610 (2019).
24. Rasch, B. & Born, J. About Sleep’s Role in Memory. *Physiol. Rev.* **93**, 681–766 (2013).
25. Squire, L. R., Genzel, L., Wixted, J. T. & Morris, R. G. Memory consolidation. *Cold Spring Harb. Perspect. Biol.* **7**, a021766 (2015).
26. Lipton, D. M., Gonzales, B. J. & Citri, A. Dorsal Striatal Circuits for Habits, Compulsions and Addictions. *Front. Syst. Neurosci.* **13**, 28 (2019).
27. Lee, J. L. C., Nader, K. & Schiller, D. An Update on Memory Reconsolidation Updating. *Trends Cogn. Sci.* **21**, 531–545 (2017).
28. Egert, D. G. *et al.* Cellular-scale silicon probes for high-density, precisely-localized neurophysiology. *J. Neurophysiol.* (2020). doi:10.1152/jn.00352.2020
29. Aoki, S. *et al.* An open cortico-basal ganglia loop allows limbic control over motor output via the nigrothalamic pathway. *Elife* **8**, (2019).
30. Watson, B. O., Levenstein, D., Greene, J. P., Gelineas, J. N. & Buzsáki, G. Network Homeostasis and State Dynamics of Neocortical Sleep. *Neuron* **90**, 839–852 (2016).
31. Rueda-Orozco, P. E. & Robbe, D. The striatum multiplexes contextual and kinematic information to constrain motor habits execution. *Nat. Neurosci.* **18**, 453–460 (2015).
32. Flint, R. D., Scheid, M. R., Wright, Z. A., Solla, S. A. & Slutzky, M. W. Long-Term Stability of Motor Cortical Activity: Implications for Brain Machine Interfaces and Optimal Feedback Control. *J. Neurosci.* **36**, 3623 (2016).
33. Yazdan-Shahmorad, A., Silversmith, D. B., Kharazia, V. & Sabes, P. N. Targeted cortical reorganization using optogenetics in non-human primates. *Elife* **7**, (2018).
34. Thorn, C. A. & Graybiel, A. M. Differential Entrainment and Learning-Related Dynamics of Spike and Local Field Potential Activity in the Sensorimotor and Associative Striatum. *J. Neurosci.* **34**, 2845–2859 (2014).
35. Huber, R., Felice Ghilardi, M., Massimini, M. & Tononi, G. Local sleep and learning. *Nature* **430**, 78–81 (2004).
36. Durkin, J. *et al.* Cortically coordinated NREM thalamocortical oscillations play an essential, instructive role in visual system plasticity. *Proc. Natl. Acad. Sci.* **114**, 10485–10490 (2017).
37. Ramanathan, D. S., Gulati, T. & Ganguly, K. Sleep-Dependent Reactivation of Ensembles in Motor Cortex Promotes Skill Consolidation. *PLOS Biol.* **13**, e1002263 (2015).
38. Silversmith, D. B., Lemke, S. M., Egert, D., Berke, J. D. & Ganguly, K. The Degree of Nesting between Spindles and Slow Oscillations Modulates Neural Synchrony. *J. Neurosci.* **40**, 4673–4684 (2020).
39. Niethard, N., Ngo, H.-V. V., Ehrlich, I. & Born, J. Cortical circuit activity underlying sleep slow oscillations and spindles. *Proc. Natl. Acad. Sci.* **115**, E9220–E9229 (2018).
40. Hoffman, K. L. & McNaughton, B. L. Coordinated reactivation of distributed memory traces in primate neocortex. *Science (80- )*. **297**, 2070–2073 (2002).

41. Lansink, C. S., Goltstein, P. M., Lankelma, J. V., McNaughton, B. L. & Pennartz, C. M. A. Hippocampus Leads Ventral Striatum in Replay of Place-Reward Information. *PLoS Biol.* **7**, e1000173 (2009).
42. Sjulson, L., Peyrache, A., Cumpelik, A., Cassataro, D. & Buzsáki, G. Cocaine Place Conditioning Strengthens Location-Specific Hippocampal Coupling to the Nucleus Accumbens. *Neuron* **98**, 926-934.e5 (2018).
43. Ji, D. & Wilson, M. A. Coordinated memory replay in the visual cortex and hippocampus during sleep. *Nat. Neurosci.* **10**, 100–107 (2007).
44. Girardeau, G., Inema, I. & Buzsáki, G. Reactivations of emotional memory in the hippocampus-amygdala system during sleep. *Nat. Neurosci.* **20**, 1634–1642 (2017).
45. Ribeiro, S. *et al.* Long-Lasting Novelty-Induced Neuronal Reverberation during Slow-Wave Sleep in Multiple Forebrain Areas. *PLoS Biol.* **2**, e24 (2004).
46. Rasch, B. & Born, J. About Sleep's Role in Memory. *Physiol. Rev.* **93**, 681–766 (2013).
47. Yu, J. Y., Liu, D. F., Loback, A., Grossrubatscher, I. & Frank, L. M. Specific hippocampal representations are linked to generalized cortical representations in memory. *Nat. Commun.* (2018). doi:10.1038/s41467-018-04498-w
48. Tingley, D. & Peyrache, A. On the methods for reactivation and replay analysis. *Philosophical Transactions of the Royal Society B: Biological Sciences* (2020). doi:10.1098/rstb.2019.0231
49. Yin, H. H. *et al.* Dynamic reorganization of striatal circuits during the acquisition and consolidation of a skill. **12**, (2009).
50. Rosanova, M. & Ulrich, D. Pattern-specific associative long-term potentiation induced by a sleep spindle-related spike train. *J. Neurosci.* **25**, 9398–9405 (2005).
51. Chauvette, S., Seigneur, J. & Timofeev, I. Sleep oscillations in the thalamocortical system induce long-term neuronal plasticity. *Neuron* **75**, 1105 (2012).
52. Churchland, M. M. *et al.* Neural population dynamics during reaching. *Nature* **487**, 51–6 (2012).
53. Fischer, S., Hallschmid, M., Elsner, A. L. & Born, J. Sleep forms memory for finger skills. *Proc. Natl. Acad. Sci.* **99**, 11987–11991 (2002).
54. Walker, M. P., Brakefield, T., Morgan, A., Hobson, J. A. & Stickgold, R. Practice with Sleep Makes Perfect: Sleep-Dependent Motor Skill Learning. *Neuron* **35**, 205–211 (2002).
55. Nagai, H. *et al.* Sleep consolidates motor learning of complex movement sequences in mice. *Sleep* (2017). doi:10.1093/sleep/zsw059
56. Gerdeman, G. L., Partridge, J. G., Lupica, C. R. & Lovinger, D. M. It could be habit forming: drugs of abuse and striatal synaptic plasticity. *Trends Neurosci.* **26**, 184–192 (2003).

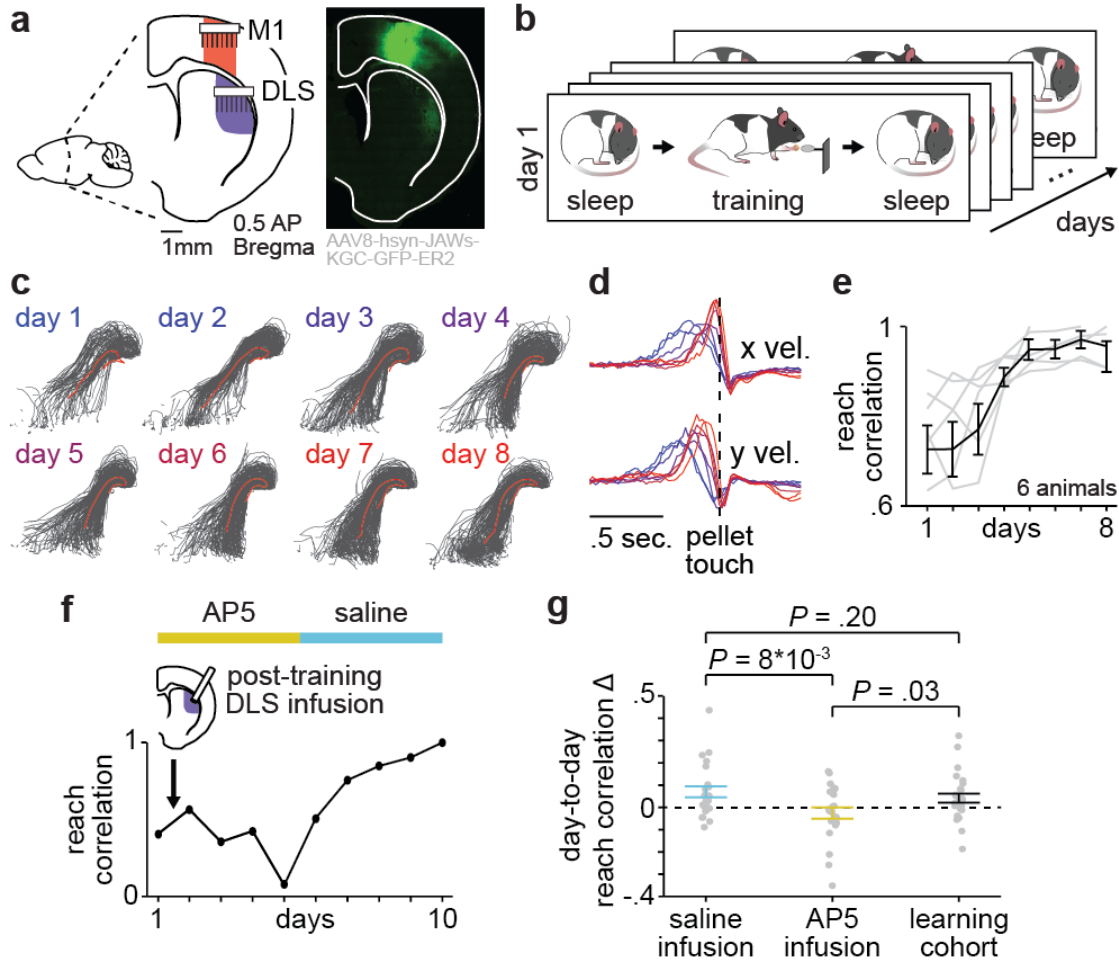

373 **Figure 1. Offline striatal NMDA receptor activation is required to develop a consistent**  
 374 **behavior.** **a.** Schematic displaying primary motor cortex (M1) and dorsolateral striatum (DLS)  
 375 recording locations (left) and labeled M1 projections showing direct input to the DLS (right). **b.**  
 376 Schematic showing each day's recording blocks during long-term training. **c.** Individual reach  
 377 trajectories in grey overlaid with mean reach trajectory across trials in red for each day of training  
 378 in example animal. **d.** Average reach velocity profile in x and y dimensions for each day of training  
 379 in example animal. **e.** Reach velocity profile correlation for first eight days of training for  
 380 individual animals in grey overlaid with mean  $\pm$  SEM across animals in black. **f.** Day-to-day  
 381 evolution in reach velocity profile correlation with post-training DLS infusions of either AP5 or  
 382 saline in example animal. **g.** Comparison of day-to-day changes in reach velocity profile  
 383 correlation with post-training saline infusion, post-training AP5 infusion, or no infusion in learning  
 384 cohort animals, showing specific decrease in day-to-day reach velocity profile correlation with  
 385 post-training AP5 infusion. Individual day-to-day changes as grey dots overlaid with mean  $\pm$  SEM  
 386 across all day-to-day changes in color.

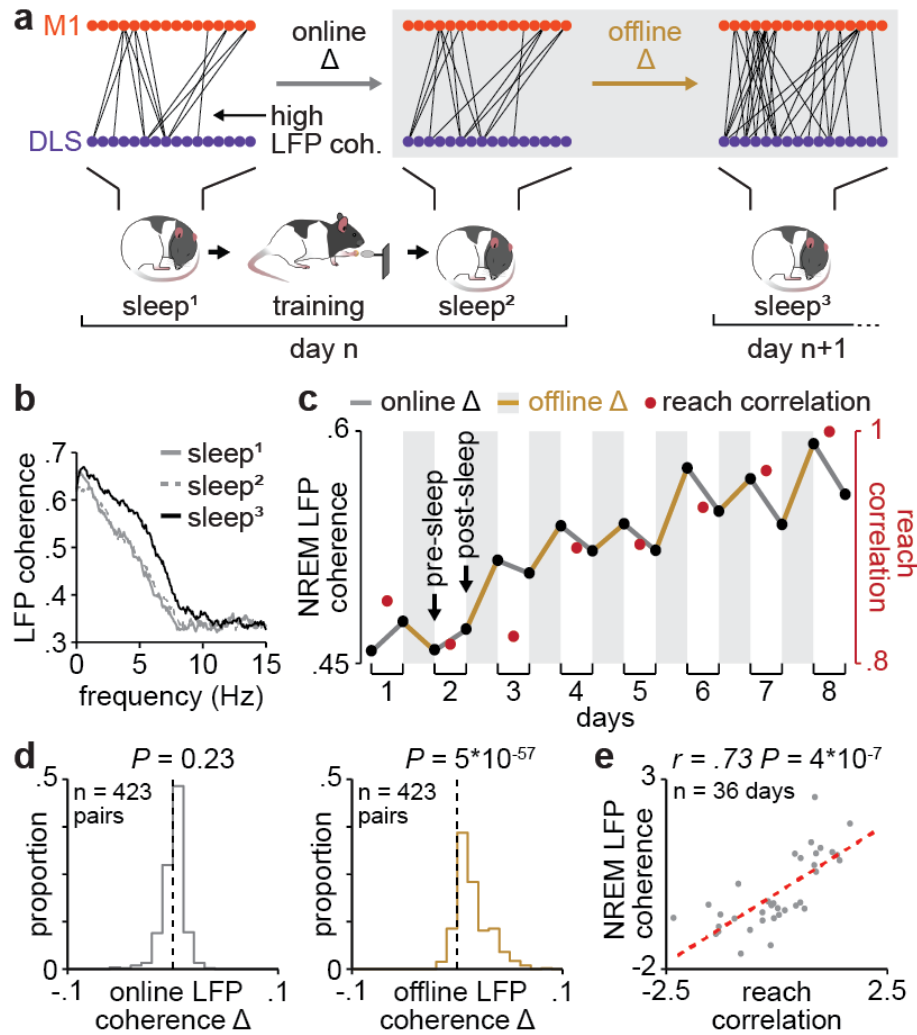

387 **Figure 2. Corticostriatal functional connectivity increases during offline periods. a.**  
 388 Schematic depicting M1 and DLS electrode pairs with high 4-8Hz LFP coherence (>0.6 coherence  
 389 value measured in NREM) during pre- and post-sleep on one day of training and pre-sleep on the  
 390 next day of training, showing an increase in the number of high LFP coherence pairs occurring  
 391 offline rather than online, in example animal. **b.** LFP coherence spectrums (measured in NREM)  
 392 across example M1 and DLS electrode pair for pre- and post-sleep periods represented in panel **a.**  
 393 showing an increase in 4-8Hz LFP coherence largely occurring offline rather than online. **c.** LFP  
 394 coherence (4-8Hz measured in NREM) for each pre- and post-sleep period throughout learning for  
 395 example M1 and DLS electrode pair, showing increases in coherence largely occurring offline  
 396 rather than online, overlaid with reach velocity profile correlation values for each day of training.  
 397 **d.** Comparison of distributions of online (left) and offline (right) changes in LFP coherence (4-  
 398 8Hz measured in NREM) averaged across training days for M1 and DLS electrode pairs across  
 399 animals. **e.** Correlation between each day's mean LFP coherence (mean 4-8Hz measured in NREM)  
 400 during both pre- and post-sleep) and reach velocity profile correlation value.

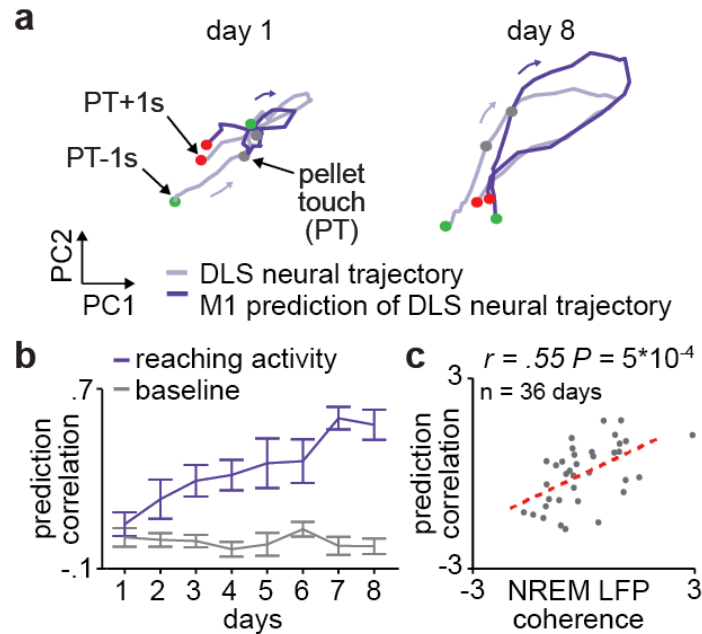

401 **Figure 3. Offline increases in functional connectivity predict the emergence of low-**  
402 **dimensional cross-area neural dynamics during behavior. a.** Trial-averaged neural trajectory  
403 (PC1 and PC2) of DLS activity during reaching (one second before to one second after pellet  
404 touch) on day one (left) and day eight (right) of training in example animal, overlaid with  
405 prediction of DLS neural trajectory from M1 spiking activity. **b.** Ability to predict DLS neural  
406 trajectory (PC1 and PC2) during reaching and during a baseline, non-reaching, period from M1  
407 spiking activity on each day of training (mean  $\pm$  SEM across animals). **c.** Correlation between each  
408 day's mean LFP coherence (mean 4-8Hz measured in NREM during both pre- and post-sleep) and  
409 ability to predict DLS neural trajectory (PC1 and PC2) during reaching from M1 spiking activity.

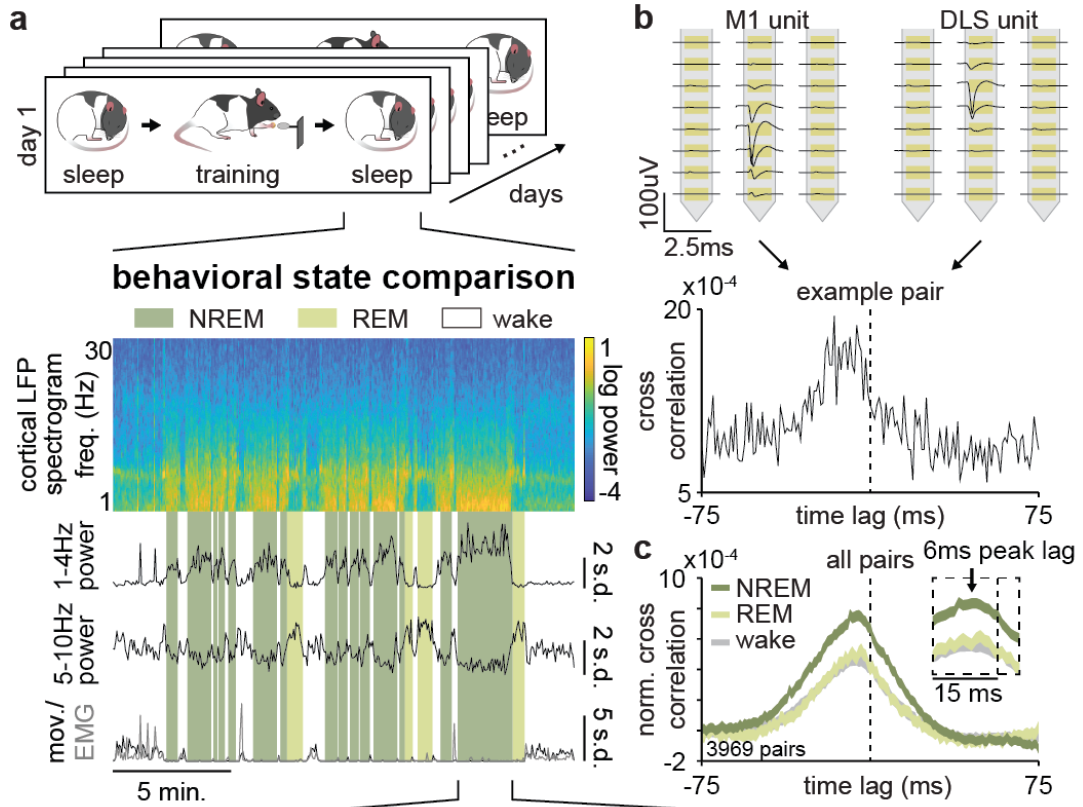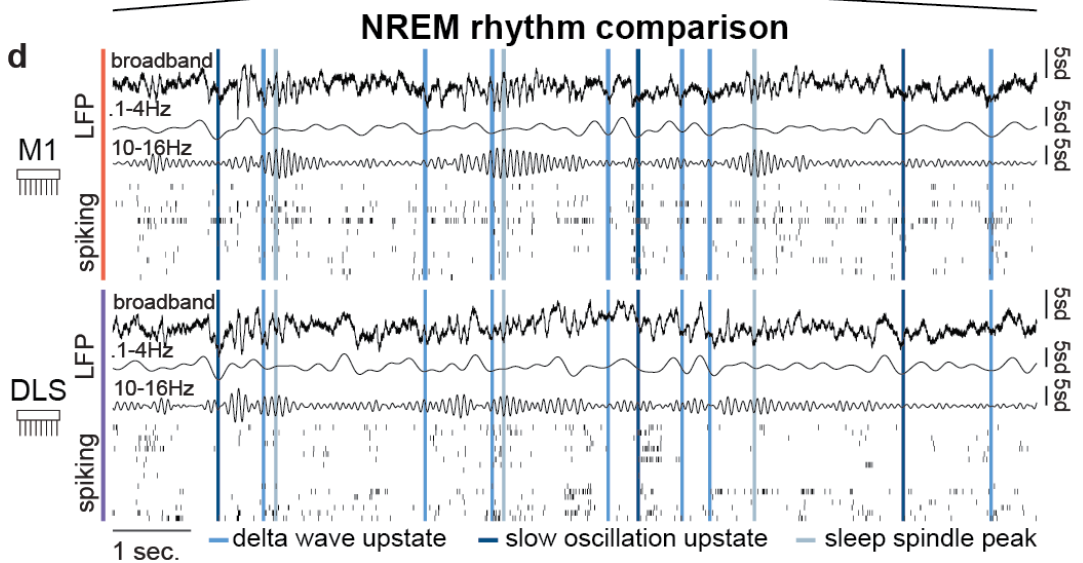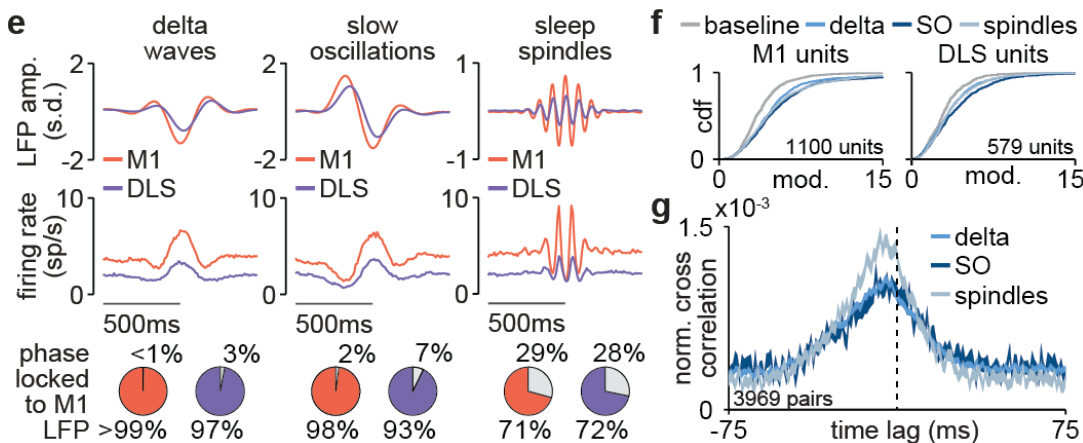



410 **Figure 4. Corticostriatal transmission strength within offline periods is maximal during sleep**  
411 **spindles in NREM. a.** M1 local field potential (LFP) spectrogram and behavioral state detection  
412 from example session. **b.** Example M1 and DLS single unit sorting from high-density silicon probe  
413 (top) and cross correlation of spiking activity centered on DLS unit spiking for an example pair of  
414 M1 and DLS units showing a short-latency peak indicating putative monosynaptically connectivity  
415 (bottom). **c.** Comparison of normalized cross correlations of spiking activity from all putatively  
416 connected pairs of M1 and DLS units across behavioral states, showing that corticostriatal  
417 transmission strength is maximal in NREM (width of line represents mean  $\pm$  SEM). **d.** Snippet of  
418 LFP and single unit spiking activity from M1 and DLS during NREM overlaid with detected  
419 NREM rhythms in M1. **e.** Mean LFP and spiking activity during slow oscillations, delta waves,  
420 and sleep spindles in both M1 and DLS in example animal (top) and percentage of M1 and DLS  
421 units across animals significantly phase locked to M1 LFP during each NREM rhythm  
422 (significance threshold of  $P = 0.05$ , Rayleigh test of uniformity, bottom). **f.** Comparison of firing  
423 rate modulation distributions for M1 (left) and DLS (right) units across animals during slow  
424 oscillations, delta waves, sleep spindles, and a baseline NREM period. **g.** Comparison of  
425 normalized cross correlations of spiking activity for all putatively connected pairs of M1 and DLS  
426 units across NREM rhythms, showing that corticostriatal transmission strength is maximal during  
427 sleep spindles (width of line represents mean  $\pm$  SEM).

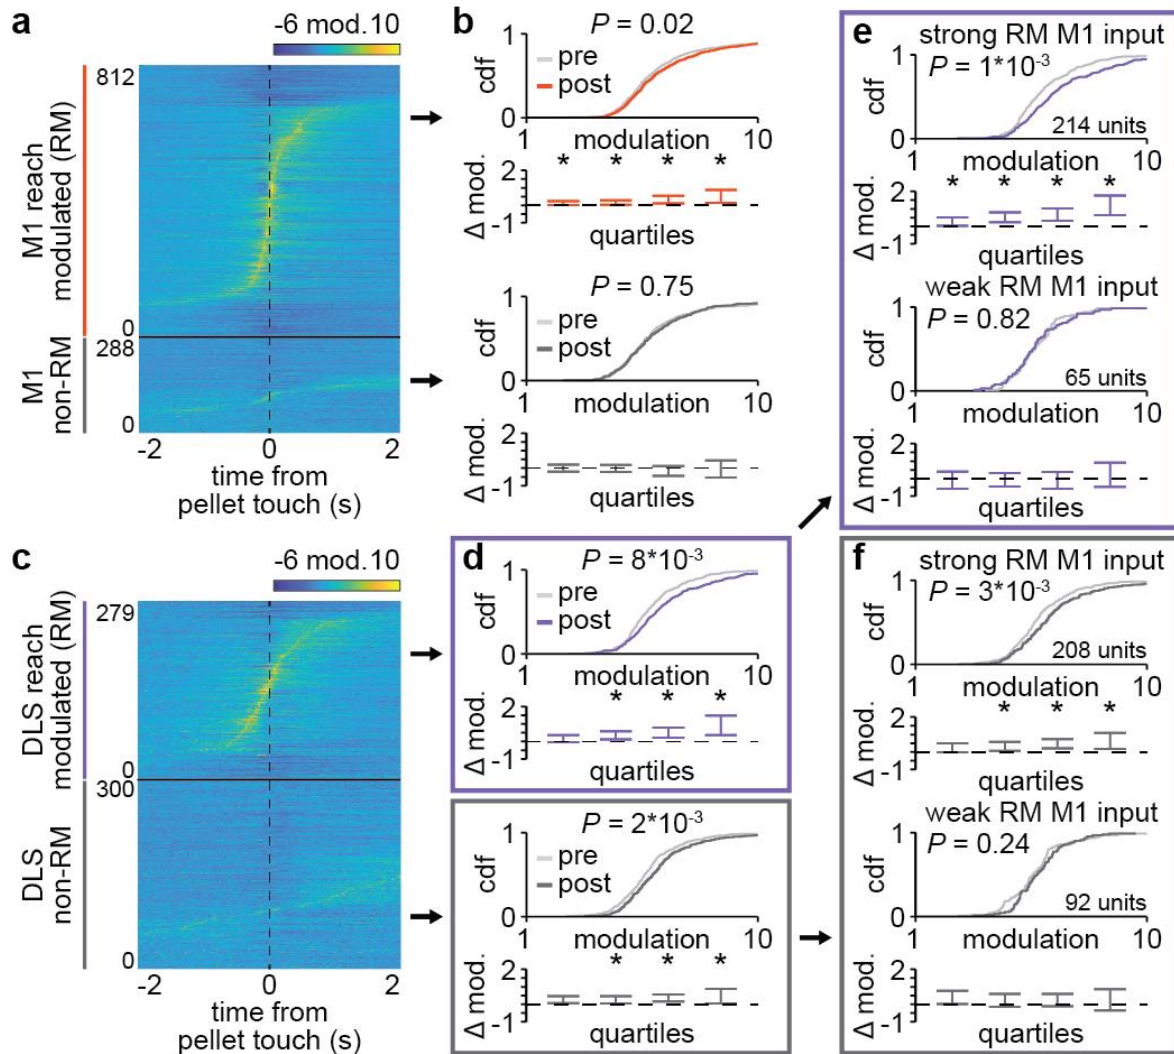

428 **Figure 5. Striatal reactivations during sleep spindles reflect cortical input.** **a.** Trial-averaged  
 429 spiking activity during reaching for all reach modulated (RM) and non-RM M1 units across days  
 430 and animals. **b.** Comparison of distributions of sleep spindle modulation during pre- and post-sleep  
 431 for RM (top) and non-RM (bottom) M1 units, showing increased modulation from pre- to post-  
 432 sleep specifically in RM M1 units. **c.** Trial-averaged spiking activity during reaching for all reach  
 433 modulated (RM) and non-RM DLS units across days and animals. **d.** Comparison of distributions  
 434 of sleep spindle modulation during pre- and post-sleep for RM (top) and non-RM (bottom) DLS  
 435 units, showing increased modulation from pre- to post-sleep in both RM and non-RM DLS units.  
 436 **e.** Comparison of distributions of sleep spindle modulation during pre- and post-sleep for RM DLS  
 437 units with strong RM M1 input (top) and weak or no RM M1 input (bottom), showing increased  
 438 modulation from pre- to post-sleep specifically in RM DLS units with strong RM M1 input. **f.**  
 439 Comparison of distributions of sleep spindle modulation during pre- and post-sleep for non-RM  
 440 DLS units with strong RM M1 input (top) and weak or no RM M1 input (bottom), showing  
 441 increased modulation from pre- to post-sleep specifically in non-RM DLS units with strong RM  
 442 M1 input.

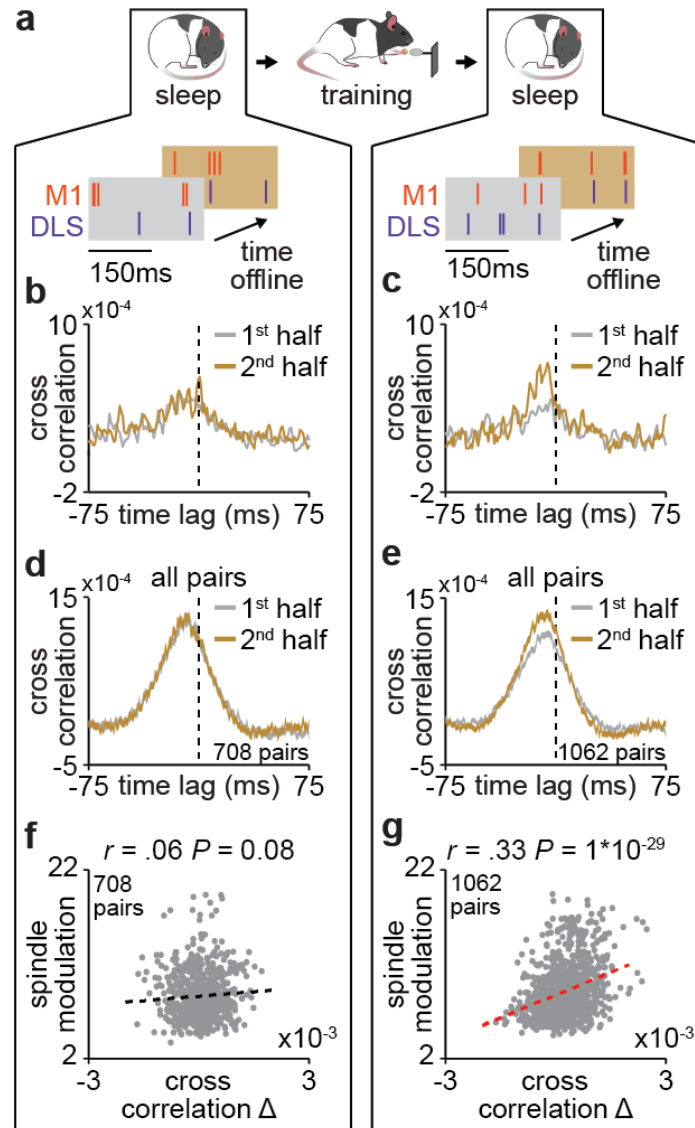

443 **Figure 6. Sleep spindle modulation predicts offline changes in corticostriatal coupling. a.**  
 444 Schematic of NREM spiking activity snippets from example M1 and DLS units depicting the  
 445 evolution of M1 and DLS spiking relationships from the first to second half of pre- (left) and post-  
 446 sleep (right). **b.** Cross correlations of spiking activity during NREM from example M1 and DLS  
 447 unit pair during the first and second half of pre-sleep, showing no change in cross correlation  
 448 magnitude. **c.** Same as **b** for post-sleep, showing an increase in short-latency cross correlation  
 449 magnitude. **d.** Cross correlations of spiking activity during NREM for all pairs of RM M1 and  
 450 putatively connected DLS units that are significantly modulated to sleep spindles during the first  
 451 and second half of pre-sleep, showing no change in cross correlation magnitude (width of line  
 452 represents mean  $\pm$  SEM). **e.** Same as **d** for post-sleep, showing an increase in short-latency cross  
 453 correlation magnitude. **f.** Correlation between change in short-latency cross correlation magnitude  
 454 and mean sleep spindle modulation for all pairs of RM M1 and putatively connected DLS units  
 455 that are significantly modulated to sleep spindles during pre-sleep. **g.** Same as **f** for post-sleep.

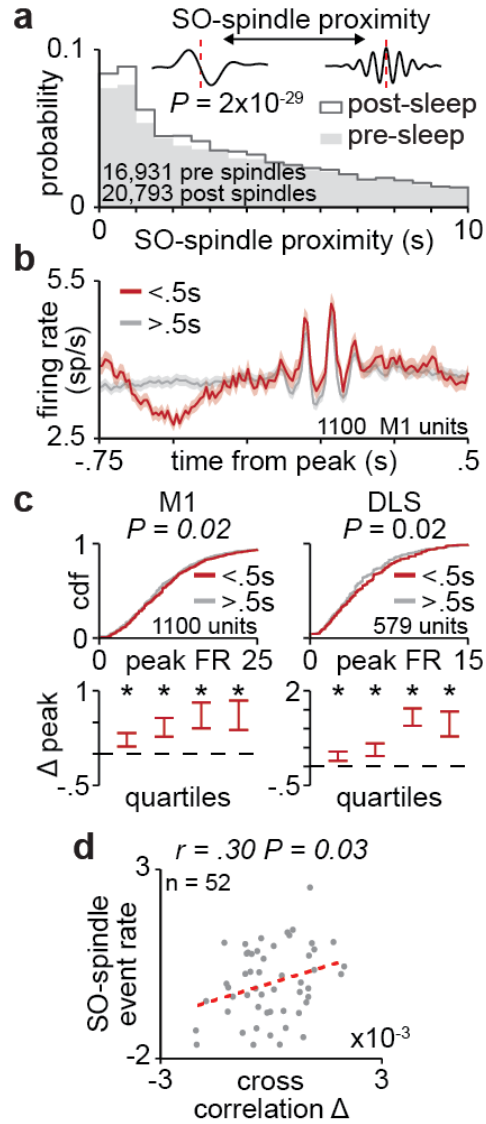

456 **Figure 7. The interaction between sleep spindles and slow oscillations impact the role of sleep**  
 457 **spindles within the corticostriatal network. a.** Distributions of the temporal proximity to  
 458 preceding slow oscillations for all sleep spindles during pre- and post-sleep across days and  
 459 animals. **b.** Firing rate across M1 units during sleep spindles with close proximity to slow  
 460 oscillations (<0.5 seconds) and all other sleep spindles (width of line represents mean  $\pm$  SEM). **c.**  
 461 Comparison of distributions of peak firing rates for M1 (left) and DLS (right) units during sleep  
 462 spindles with close proximity to slow oscillations (<0.5 seconds) and all other sleep spindles. **d.**  
 463 Correlation between each days' post-sleep density of sleep spindles in close proximity to slow  
 464 oscillations (<0.5 seconds; normalized by subtracting the rate in pre-sleep and normalized within  
 465 each animal by z-scoring across days) and mean change in short-latency cross correlation across  
 466 all pairs of RM M1 and putatively connected DLS units that are significantly modulated to sleep  
 467 spindles (normalized by subtracting the change in pre-sleep and normalized within each animal by  
 468 z-scoring across days).

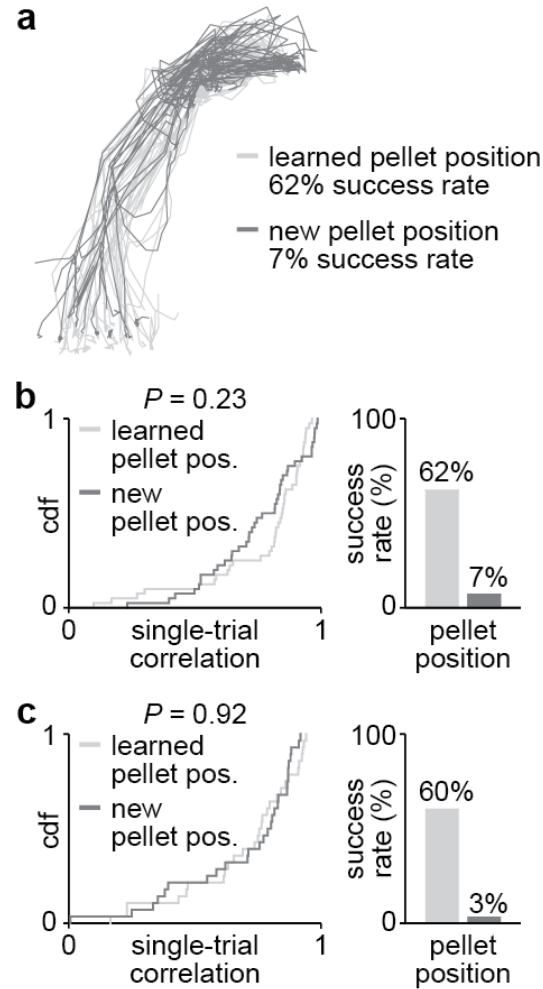

469 **Supplemental Figure 1. Animals do not adapt quickly to new pellet position after long-term**  
470 **reach-to-grasp training.** **a.** Reach trajectories from example session following reach-to-grasp  
471 task training paradigm, showing that reach trajectories with the pellet in the learned position or a  
472 new position are largely overlapping. **b.** Histogram of single-trial correlation values for individual  
473 reach trajectories to the mean reach trajectory for trials with the pellet in the learned pellet position  
474 or a new pellet position in first example animal (left; two-sample Kolmogorov–Smirnov test  
475 between distributions from trials with pellet in learned position and pellet in new position) and  
476 success rate in pellet retrieval for learned and new pellet positions (right). **c.** same as **b** for second  
477 example animal.

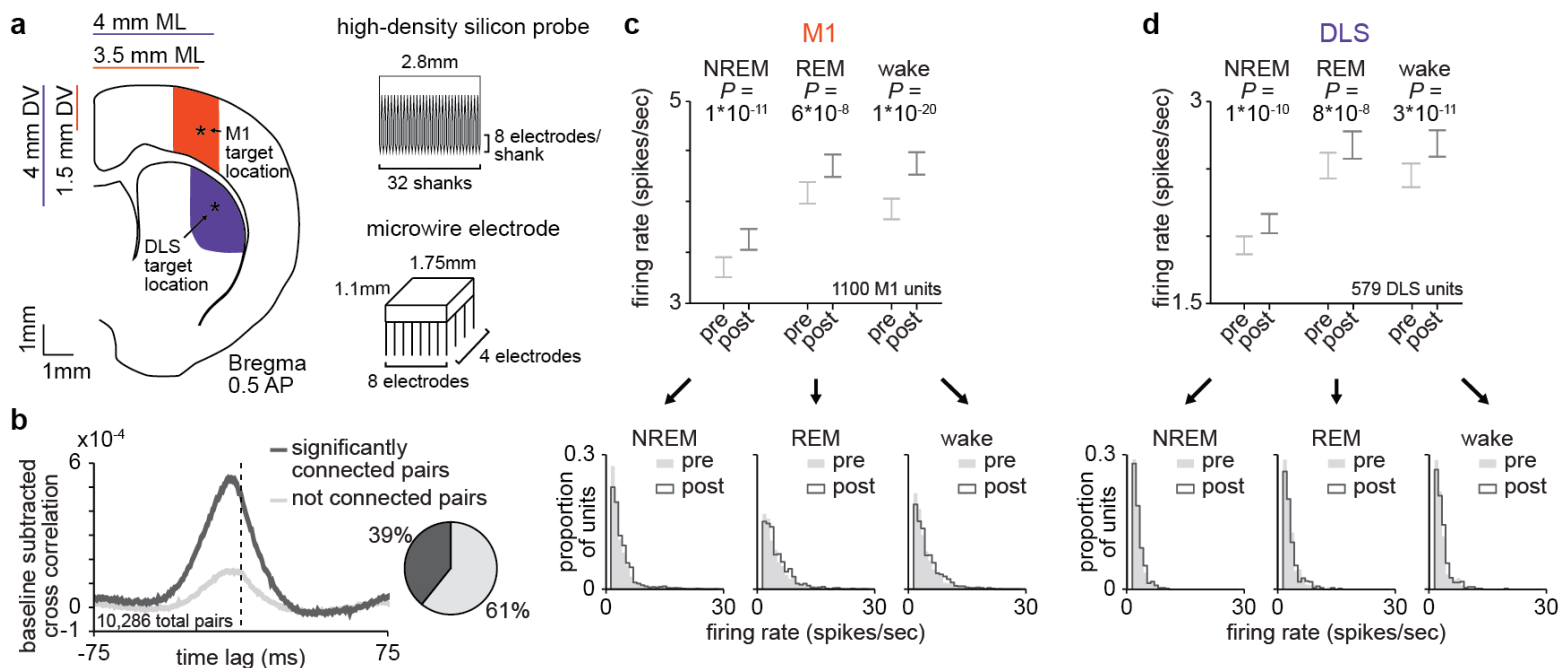

478 **Supplemental Figure 2. Electrophysiology recordings from M1 and DLS** **a.** Illustration of  
 479 target electrode locations in M1 and DLS and dimensions of microwire electrode and silicon  
 480 probes. **b.** Cross correlations of spiking activity across all pairs of putatively connected and not  
 481 putatively connected pairs of M1 and DLS units (width of line represents mean  $\pm$  SEM) and pie  
 482 chart depicting percentage of all pairs that are classified as significantly connected. **c.** Comparison  
 483 of firing rates in M1 across behavioral states, before and after training (1,100 M1 units;  $3.4 \pm 0.1$   
 484 spikes/second in pre NREM vs.  $3.7 \pm 0.1$  spikes/second in post NREM, mean  $\pm$  SEM, paired-  
 485 sample t-test:  $t(1099) = -6.8$ ,  $P = 1 \times 10^{-11}$ ;  $4.2 \pm 0.1$  spikes/second in pre REM vs.  $4.4 \pm 0.1$   
 486 spikes/second in post REM, mean  $\pm$  SEM, paired-sample t-test:  $t(1099) = -5.5$ ,  $P = 6 \times 10^{-8}$ ;  $4.0 \pm$   
 487  $0.1$  spikes/second in pre wake vs.  $4.4 \pm 0.1$  spikes/second in post wake, mean  $\pm$  SEM, paired-  
 488 sample t-test:  $t(1099) = -9.5$ ,  $P = 1 \times 10^{-20}$ ). **d.** Comparison of firing rates in DLS across behavioral  
 489 states, before and after training (579 DLS units;  $1.9 \pm 0.1$  spikes/second in pre NREM vs.  $2.1 \pm$   
 490  $0.1$  spikes/second in post NREM, mean  $\pm$  SEM, paired-sample t-test:  $t(578) = -6.5$ ,  $P = 1 \times 10^{-10}$ ;  
 491  $2.5 \pm 0.1$  spikes/second in pre REM vs.  $2.7 \pm 0.1$  spikes/second in post REM, mean  $\pm$  SEM, paired-  
 492 sample t-test:  $t(578) = -5.5$ ,  $P = 8 \times 10^{-8}$ ;  $2.4 \pm 0.1$  spikes/second in pre wake vs.  $2.8 \pm 0.1$   
 493 spikes/second in post wake, mean  $\pm$  SEM, paired-sample t-test:  $t(578) = -6.8$ ,  $P = 3 \times 10^{-11}$ ).

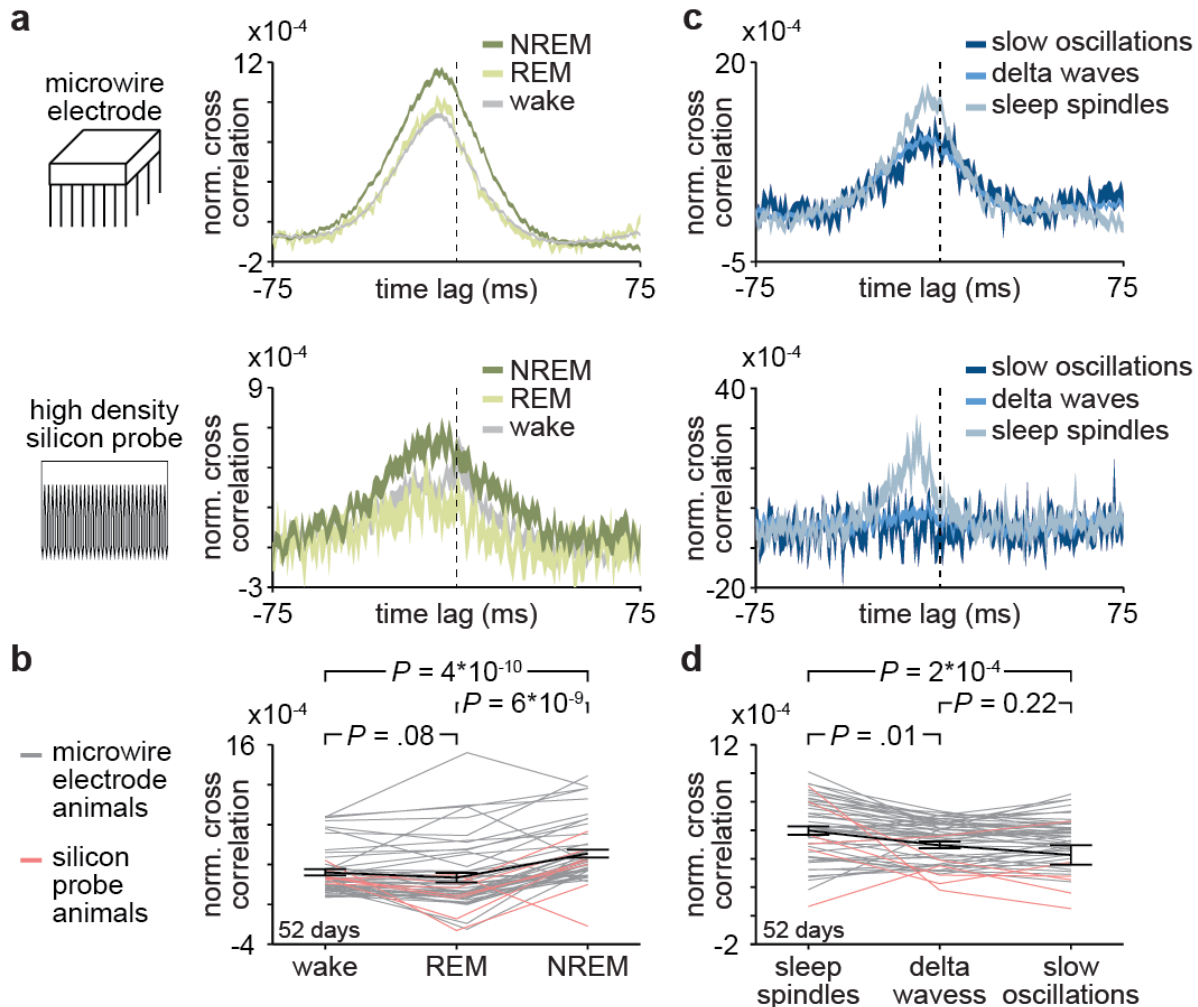

494 **Supplemental Figure 3. Corticostriatal transmission strength across behavioral states and**  
 495 **NREM rhythms.** **a.** Comparison of normalized cross correlations across behavioral states for all  
 496 putatively connected pairs of M1 and DLS units in example animals implanted with either  
 497 microwire electrode array (top) or high-density silicon probe (bottom), showing that corticostriatal  
 498 transmission strength is maximal in NREM sleep (width of line represents mean  $\pm$  SEM) **b.**  
 499 Comparison of mean short-latency correlation magnitude (1-10ms time lag) across behavioral  
 500 states, values from days for animals implanted with microwires in grey, silicon probes in red, and  
 501 mean  $\pm$  SEM across animals in black ( $n = 52$  days across 7 rats; wake:  $3.2 \times 10^{-4} \pm 0.3 \times 10^{-4}$   
 502 correlation value, REM:  $2.7 \times 10^{-4} \pm 0.5 \times 10^{-4}$  correlation value, NREM:  $5.1 \times 10^{-4} \pm 0.4 \times 10^{-4}$   
 503 correlation value; wake vs. REM:  $t(51) = 1.8$ ,  $P = 0.08$ , paired-sample t-test, REM vs. NREM:  
 504  $t(51) = -7.0$ ,  $P = 6 \times 10^{-9}$ , paired-sample t-test, wake vs. NREM:  $t(51) = -7.7$ ,  $P = 4 \times 10^{-10}$ , paired-  
 505 sample t-test). **c.** Comparison of normalized cross correlations across NREM rhythms for all  
 506 putatively connected pairs of M1 and DLS units in example animals implanted with either  
 507 microwire electrode array (top) or high-density silicon probe (bottom), showing that corticostriatal  
 508 transmission strength is maximal during sleep spindles (width of line represents mean  $\pm$  SEM). **d.**  
 509 Comparison of mean short-latency correlation magnitude (1-10ms time lag) across NREM  
 510 rhythms, values from days for animals implanted with microwires in grey, silicon probes in red,  
 511 and mean  $\pm$  SEM across animals in black ( $n = 52$  days across 7 rats; sleep spindles:  $9.9 \times 10^{-4} \pm$

512  $0.8 \cdot 10^{-4}$  correlation value, delta waves:  $7.5 \cdot 10^{-4} \pm 0.6 \cdot 10^{-4}$  correlation value, slow oscillations:  
513  $5.7 \cdot 10^{-4} \pm 1.7 \cdot 10^{-4}$  correlation value; sleep spindles vs. slow oscillation:  $t(51) = 4.0$ ,  $P = 2 \cdot 10^{-4}$ ,  
514 paired-sample t-test, delta waves vs. slow oscillations:  $t(51) = 1.2$ ,  $P = 0.22$ , paired-sample t-test,  
515 sleep spindles vs. delta waves:  $t(51) = 2.4$ ,  $P = 0.01$ , paired-sample t-test).



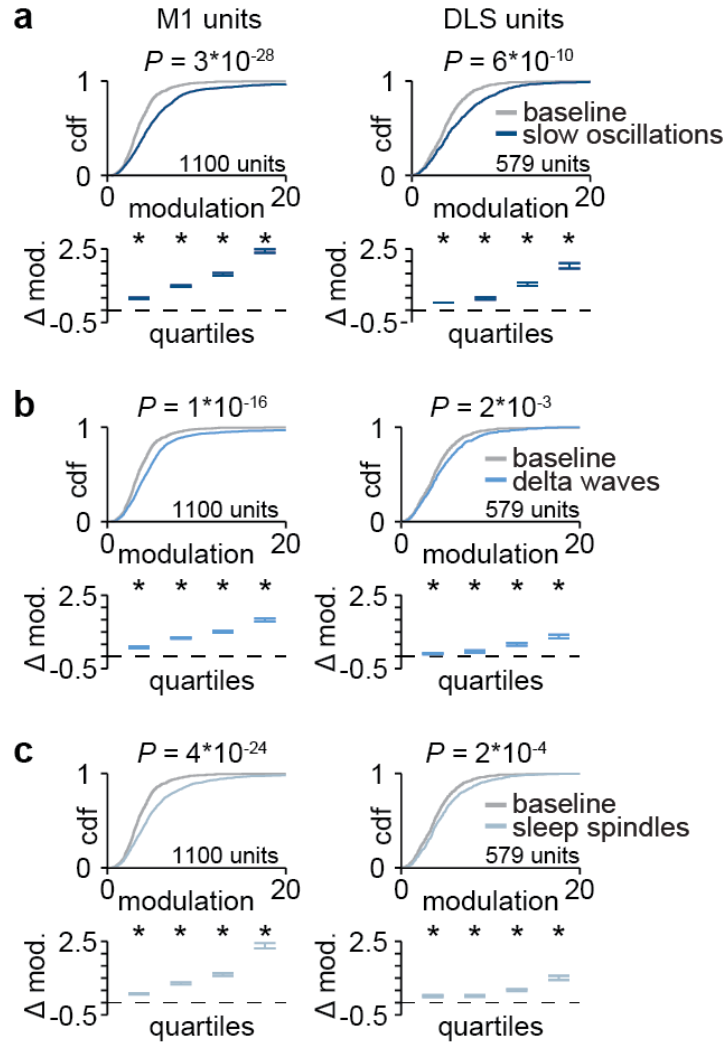

516 **Supplemental Figure 4. Corticostriatal modulation across NREM rhythms.** **a.** Comparison of  
 517 firing rate modulation distributions for M1 (left) and DLS (right) units during slow oscillations  
 518 and a baseline NREM period (M1:  $P = 3 \times 10^{-28}$ , DLS:  $P = 6 \times 10^{-10}$ , two-sample Kolmogorov–  
 519 Smirnov test, followed by a shift test to assess how quartiles of the distribution differed). **b.**  
 520 Comparison of firing rate modulation distributions for M1 (left) and DLS (right) units during delta  
 521 waves and a baseline NREM period (M1:  $P = 1 \times 10^{-16}$ , DLS:  $P = 2 \times 10^{-3}$ , two-sample Kolmogorov–  
 522 Smirnov test, followed by a shift test to assess how quartiles of the distribution differed). **c.**  
 523 Comparison of firing rate modulation distributions for M1 (left) and DLS (right) units during sleep  
 524 spindles and a baseline NREM period (M1:  $P = 4 \times 10^{-24}$ , DLS:  $P = 2 \times 10^{-4}$ , two-sample  
 525 Kolmogorov–Smirnov test, followed by a shift test to assess how quartiles of the distribution  
 526 differed).

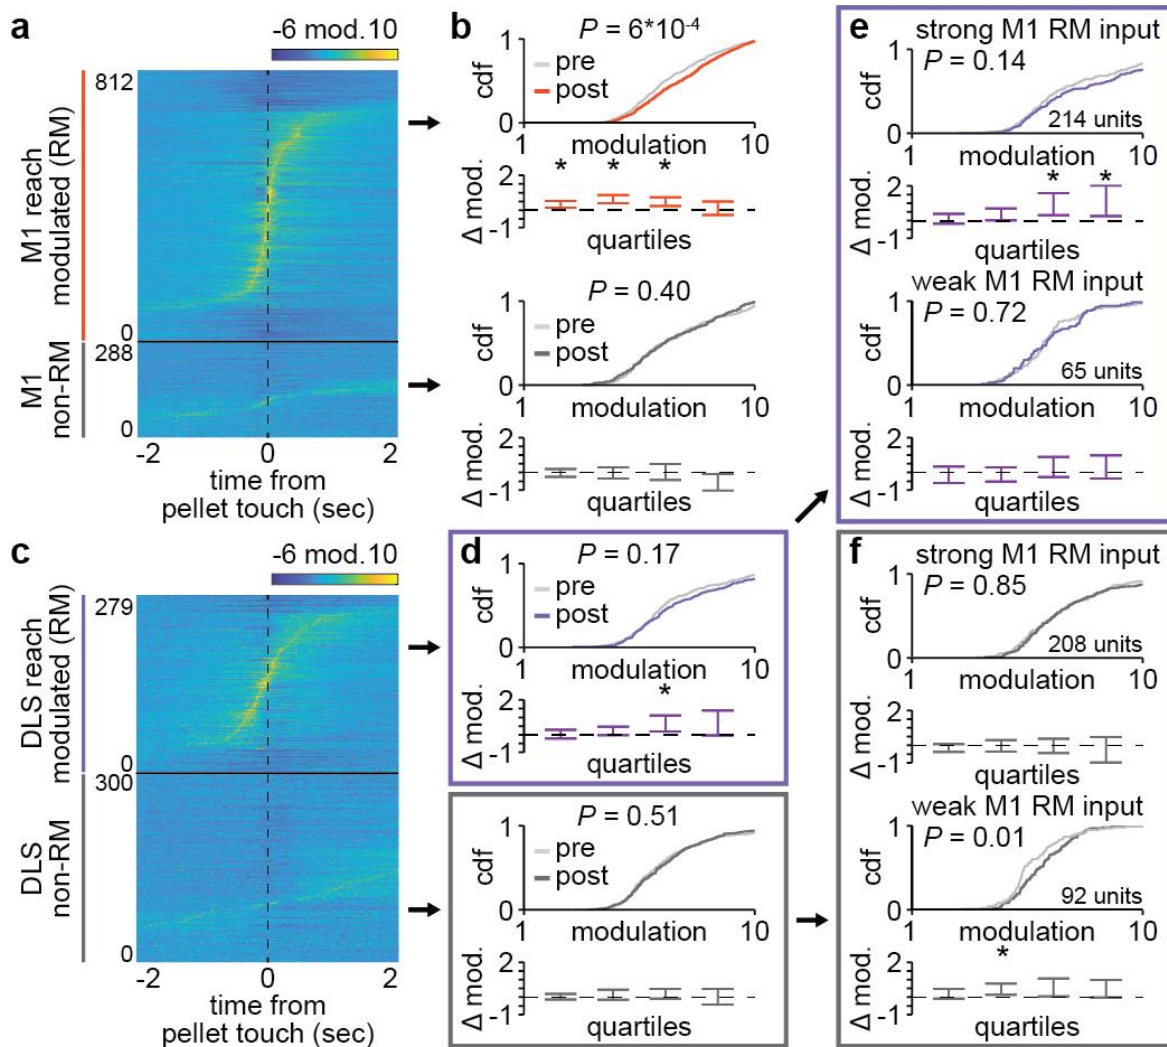

527 **Supplemental Figure 5. Delta wave modulation change with training.** **a.** Trial-averaged  
 528 spiking activity during reaching for all reach modulated (RM) and non-RM M1 units across days  
 529 and animals. **b.** Comparison of distributions of delta wave modulation during pre- and post-sleep  
 530 for RM (top) and non-RM (bottom) M1 units (RM M1 units:  $P = 6 \times 10^{-4}$ , non-RM M1 units:  $P =$   
 531  $0.40$ , two-sample Kolmogorov–Smirnov test between distributions from pre- and post-sleep,  
 532 followed by a shift test to assess how quartiles of the distributions differed;  $P$  values for the rest  
 533 of Supplemental Figure 5 legend reflect these statistical tests). **c.** Trial-averaged spiking activity  
 534 during reaching for all reach modulated (RM) and non-RM DLS units across days and animals. **d.**  
 535 Comparison of distributions of delta wave modulation during pre- and post-sleep for RM (top) and  
 536 non-RM (bottom) DLS units (RM DLS units:  $P = 0.17$ , non-RM M1 units:  $P = 0.51$ ). **e.**  
 537 Comparison of distributions of delta wave modulation during pre- and post-sleep for RM DLS  
 538 units with strong RM M1 input (top) and weak or no RM M1 input (bottom; RM DLS units with  
 539 strong RM M1 input:  $P = 0.14$ , RM DLS units with weak or no RM M1 input:  $P = 0.72$ ). **f.**  
 540 Comparison of distributions of delta wave modulation during pre- and post-sleep for non-RM DLS  
 541 units with strong RM M1 input (top) and weak or no RM M1 input (bottom; non-RM DLS units  
 542 with strong RM M1 input:  $P = 0.85$ , non-RM DLS units with weak or no RM M1 input:  $P = 0.01$ ).

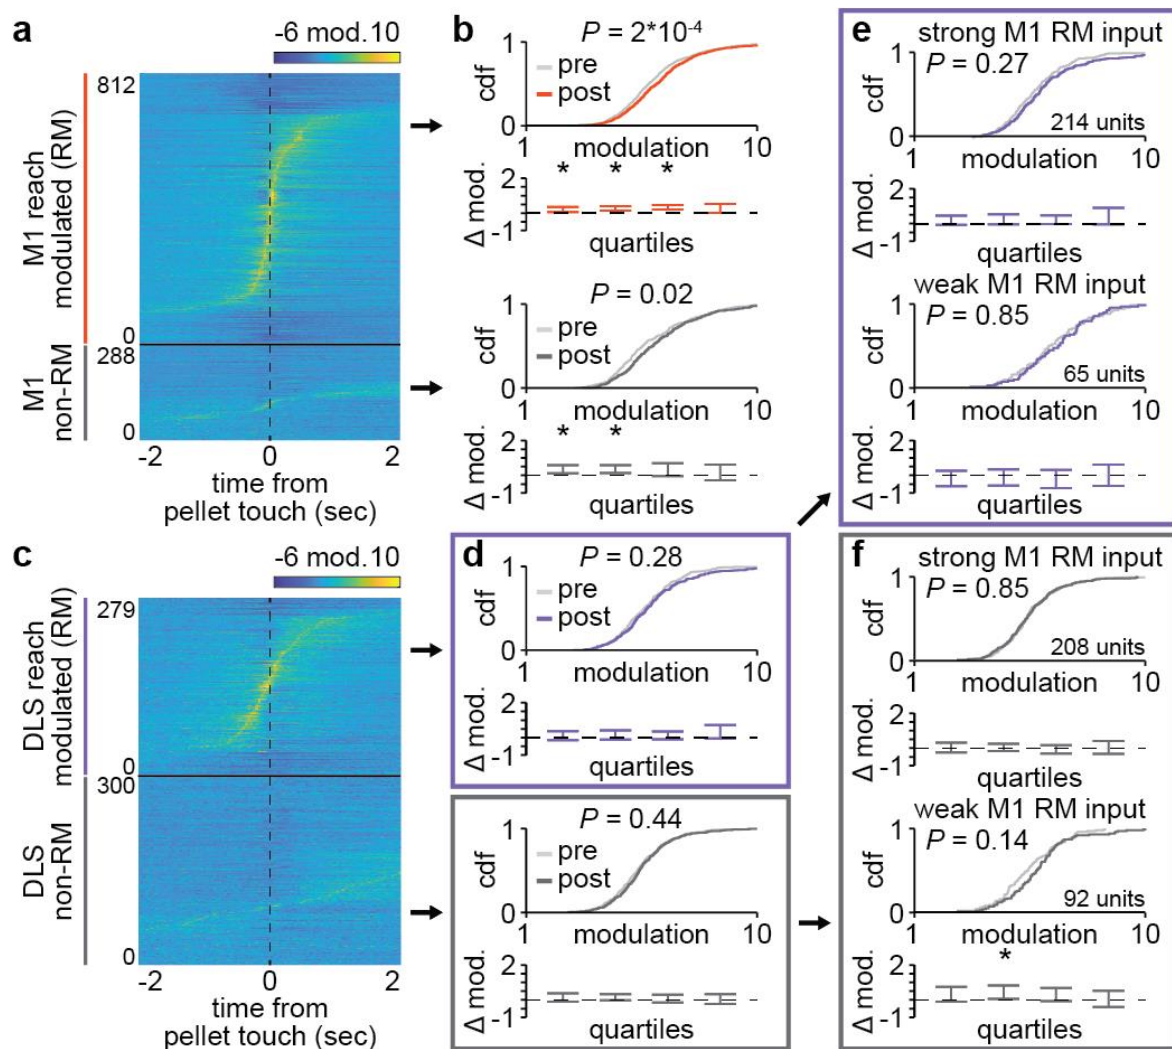

543 **Supplemental Figure 6. Slow oscillation modulation change with training.** **a.** Trial-averaged  
 544 spiking activity during reaching for all reach modulated (RM) and non-RM M1 units across days  
 545 and animals. **b.** Comparison of distributions of slow oscillation modulation during pre- and post-  
 546 sleep for RM (top) and non-RM (bottom) M1 units (RM M1 units:  $P = 2 \times 10^{-4}$ , non-RM M1 units:  
 547  $P = 0.02$ , two-sample Kolmogorov–Smirnov test between distributions from pre- and post-sleep,  
 548 followed by a shift test to assess how quartiles of the distributions differed;  $P$  values for the rest  
 549 of Supplemental Figure 6 legend reflect these statistical tests). **c.** Trial-averaged spiking activity  
 550 during reaching for all reach modulated (RM) and non-RM DLS units across days and animals. **d.**  
 551 Comparison of distributions of slow oscillation modulation during pre- and post-sleep for RM  
 552 (top) and non-RM (bottom) DLS units (RM DLS units:  $P = 0.28$ , non-RM M1 units:  $P = 0.44$ ). **e.**  
 553 Comparison of distributions of slow oscillation modulation during pre- and post-sleep for RM DLS  
 554 units with strong RM M1 input (top) and weak or no RM M1 input (bottom; RM DLS units with  
 555 strong RM M1 input:  $P = 0.27$ , RM DLS units with weak or no RM M1 input:  $P = 0.85$ ). **f.**  
 556 Comparison of distributions of slow oscillation modulation during pre- and post-sleep for non-RM  
 557 DLS units with strong RM M1 input (top) and weak or no RM M1 input (bottom; non-RM DLS  
 558 units with strong RM M1 input:  $P = 0.85$ , non-RM DLS units with weak or no RM M1 input:  $P =$   
 559 0.14).

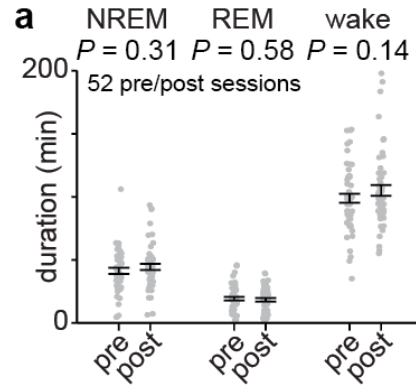

560 **Supplemental Figure 7. Comparison of time spent in each behavioral state during pre- and**  
561 **post-sleep. a.** Comparison of durations spent in each behavioral state during pre- and post-sleep  
562 across days and animals (NREM:  $41.2 \pm 2.4$  minutes of pre NREM vs.  $44.3 \pm 2.5$  minutes of post  
563 NREM, mean  $\pm$  SEM, paired-sample t-test:  $t(51) = -1.03$ ,  $P = 0.31$ ; REM:  $17.2 \pm 1.4$  minutes of  
564 pre REM vs.  $16.3 \pm 1.4$  minutes of post REM, mean  $\pm$  SEM, paired-sample t-test:  $t(51) = 0.56$ ,  $P$   
565  $= 0.58$ ; wake:  $98.8 \pm 3.6$  minutes of pre wake vs.  $106.0 \pm 4.3$  minutes of post wake, mean  $\pm$  SEM,  
566 paired-sample t-test:  $t(51) = -1.5$ ,  $P = 0.14$ ).

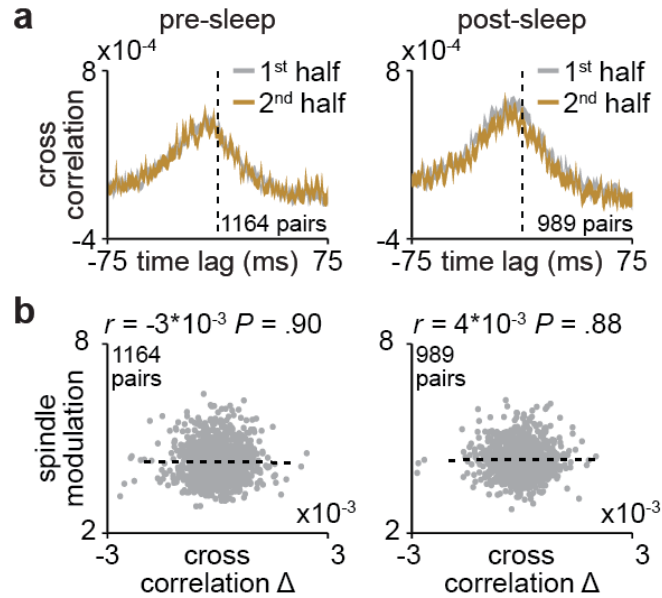

567 **Supplemental Figure 8. Corticostriatal transmission strength changes for non-sleep spindle**  
568 **modulated pairs of M1 and DLS units. a.** Cross correlations of spiking activity during NREM  
569 for all pairs of RM M1 and putatively connected DLS units that are not significantly modulated to  
570 sleep spindles during the first and second half of pre-sleep (left) and post-sleep (right), showing  
571 no changes in cross correlation magnitude (width of line represents mean  $\pm$  SEM) **b.** Correlation  
572 between change in short-latency cross correlation magnitude and mean sleep spindle modulation  
573 for all pairs of RM M1 and putatively connected DLS units that are not significantly modulated to  
574 sleep spindles during pre-sleep (left) and post-sleep (right).

## 575 **Methods**

576

577 **Animal care and surgery (Supplemental Figure 2).** This study was performed in strict  
578 accordance with guidelines from the USDA Animal Welfare Act and United States Public Health  
579 Science Policy. Procedures were in accordance with protocols approved by the Institutional  
580 Animal Care and Use Committee at the San Francisco Veterans Affairs Medical Center. This study  
581 consists of experiments performed with fourteen male Long-Evans rats (approximately 12-16  
582 weeks old), housed under controlled temperature and a 12-h light/12-h dark cycle with lights on at  
583 6:00 a.m. Animal experiments were performed during the light period. All surgical procedures  
584 were performed using sterile techniques under 2–4% isoflurane. Six animals were implanted with  
585 either microwire electrodes ( $n = 4$  animals; 32 or 64 channel 33 $\mu$ m diameter Tungsten microwire  
586 arrays with ZIF-clip adapter; Tucker-Davis Technology) or high-density silicon probes ( $n = 2$   
587 animals; 256 channel custom-built silicon probes) targeted to both the forelimb area of M1,  
588 centered at 3.5mm lateral and 0.5mm anterior to bregma and implanted in layer V at a depth of  
589 1.5mm, and the DLS, centered at 4mm lateral and 0.5mm anterior to bregma and implanted at a  
590 depth of 4mm. Six additional animals were implanted with infusion cannulas (PlasticsOne; 26Ga)  
591 targeted to the DLS. Surgery involved exposure and cleaning of the skull, preparation of the skull  
592 surface (using cyanoacrylate), and implantation of skull screws for overall headstage stability. In  
593 the animals implanted with neural probes, a reference screw was implanted posterior to lambda,  
594 contralateral to the neural recordings and a ground screw was implanted posterior to lambda,  
595 ipsilateral to the neural recordings. Craniotomy and dural removal were then performed, followed by  
596 implantation of neural probes or infusion cannulas and securing of the implant with C&B  
597 Metabond (Parkell, Product #S380) and Duralay dental acrylic (Darby, Product #8830630). In four  
598 of the animals implanted with neural probes, the forearm was also implanted with a pair of twisted  
599 electromyography (EMG) wires (0.007" single-stranded, Teflon-coated, stainless steel wire; A-M  
600 Systems) with a hardened epoxy ball (J-B Weld Company) at one end preceded by 1–2mm of  
601 uncoated wire under the ball. Wires were inserted into the muscle belly and pulled through until  
602 the ball came to rest on the belly. EMG wires were braided, tunneled under the skin to a scalp  
603 incision and soldered into an electrode interface board (ZCA-EIB32; Tucker-Davis Technology).  
604 The postoperative recovery regimen included administration of buprenorphine at 0.02mg/kg and  
605 meloxicam at 0.2mg/kg. Dexamethasone at 0.5mg/kg and trimethoprim/sulfadiazine at 15mg/kg  
606 were also administered postoperatively for 5 days. All animals recovered for at least one week  
607 before the start of behavioral training.

608

609 ***In vivo* electrophysiology.** Units, local field potentials (LFP), and EMG activity were recorded  
610 using an RZ2 system (Tucker-Davis Technologies). For the microwire animals, spike data was  
611 sampled at 24,414Hz and LFP/EMG data at 1,017Hz. To record spiking data in these animals,  
612 thresholds for spiking activity were set online using a standard deviation of 4.5 (calculated over a  
613 1-min baseline period using the RZ2 system). Waveforms and timestamps were stored for any  
614 event that crossed that threshold. Spike sorting was then performed using Offline Sorter v.4.3.0  
615 (Plexon) with a principal component analysis-based clustering method followed by manual  
616 inspection. Spikes were sorted separately for each day, combining pre-sleep, training, and post-  
617 sleep sessions. We accepted units based on waveform shape, clear cluster boundaries in principal  
618 component space and 99.5% of detected events with an ISI>2ms. For silicon probe animals, signals  
619 were recorded at 24,414Hz. In these animals, spike times and waveforms were detected from the  
620 broadband signal using Offline Sorter v.4.3.0 (Plexon). Spike waveforms were then sorted using

621 Kilosort2 (<https://github.com/MouseLand/Kilosort2>). We accepted units based on manual  
622 inspection using Phy (<https://github.com/cortex-lab/phy>) and 99.5% of detected events with an  
623 ISI>2ms.

624  
625 **Viral injection (Figure 1a).** To label anterograde projections in M1 we injected 750nl of AAV8-  
626 hsyn-JAWs-KGC-GFP-ER2 virus into two sites (1.5mm anterior, 2.7mm lateral to bregma, at a  
627 depth of 1.4mm and 0.5 posterior, 3.5mm lateral to bregma, at a depth of 1.4mm). Two weeks after  
628 injection rats were anesthetized and transcardially perfused with 0.9% sodium chloride, followed  
629 by 4% formaldehyde. The harvested brains were post-fixed for 24 h and immersed in 20% sucrose  
630 for 2 days. Coronal cryostat sections (40- $\mu$ m thickness) were then mounted and imaged with a  
631 fluorescent microscope.

632  
633 **Reach-to-grasp task (Figure 1; Supplemental Figure 1).** Rats naïve to any motor tasks were  
634 first tested for forelimb preference. This involved presenting approximately ten food pellets to the  
635 animal and observing which forelimb was most often used to reach for the pellet. Rats then  
636 underwent surgery for either neural probe or cannula implantation in the hemisphere contralateral  
637 to preferred paw. Following the one-week recovery period, rats were trained using an automated  
638 reach-box, controlled by custom MATLAB scripts and an Arduino microcontroller. This setup  
639 requires minimal user intervention, as described previously (Wong, et al., 2015). Each trial  
640 consisted of a pellet dispensed on the pellet tray followed by an alerting beep indicating that the  
641 trial was beginning, then the door would open. Animals had to reach, grasp, and retrieve the pellet.  
642 A real-time ‘pellet detector’ using an infrared sensor centered over the pellet was used to determine  
643 when the pellet was moved, indicating the trial was over and then the door was closed. All trials  
644 were captured by a camera placed on the side of the behavioral box ( $n = 2$  animals monitored with  
645 a Microsoft LifeCam at 30 frames/second;  $n = 12$  animals monitored with a Basler ace acA640-  
646 750uc at 75 frames/second). For animals implanted with neural probes, each animal underwent  
647 five to fourteen days of training (~100–150 trials per day). For the infusion cannula implanted  
648 animals, each animal underwent ten days of training (100 trials per day). Rats had fifteen seconds  
649 to complete each trial, and trials were separated by a ten second inter-trial-interval. Reach  
650 trajectories were captured from video using DeepLabCut (Mathis, et al., 2018) to track the center  
651 of the rat’s paw as well as the food pellet. Reach trajectories consisted of the paw trajectory from  
652 500ms before to 500ms after “pellet touch”, which was classified as the frame in which the paw  
653 was closest to the pellet, before the pellet was displaced off the pellet holder. Only trials in which  
654 the pellet was displaced off the pellet holder were considered. We assessed behavioral consistency  
655 throughout training in both neural probe and cannula implanted animals by calculating the  
656 correlation between the mean velocity profile of reaches on each day of training and the mean  
657 velocity profile of reaches on the last day of training. These correlations were computed separately  
658 for the x and y dimensions and then averaged. At the end of training, we tested whether reaching  
659 behavior was automatic in two of the neural probe implanted animals by performing a 100 trial  
660 training session on the subsequent day with the pellet moved to a new location (~10mm lateral  
661 from original pellet position) and observing whether the animal’s reaching behavior changed. We  
662 performed a similar experiment for two additional animals naïve to the task and without neural  
663 implant to test whether reaching was flexible or automatic at the start of training. These animals  
664 performed ~200 trials on two consecutive days. To calculate single-trial reach trajectory  
665 correlations, we first generated a mean trajectory in each dimension (x and y) for trials with the  
666 pellet in the learned position and trials with the pellet in the new position (mean trajectories were

667 computed separately for each pellet position). Single trial trajectories were then correlated to the  
668 mean trajectory in each dimension and then averaged across the x and y dimension. To compare  
669 across pellet positions, we considered reach trajectories up to pellet touch (from 500ms before  
670 pellet touch to pellet touch), as automatic reaches with the pellet in the new position often missed  
671 the pellet and pellet holder completely.

672

673 **DLS infusions (Figure 1).** To test if blocking the activation of striatal NMDA receptors during  
674 the offline period after training disrupts increases in behavioral consistency, we infused either 1ul  
675 of saline or NMDA blocker AP5 (5 $\mu$ g/ $\mu$ l) at an infusion rate 200nl/minute into the DLS  
676 immediately following training in six animals for ten consecutive days. In the first five days of  
677 training, we infused three rats with AP5 and three rats with saline, for the second five days, we  
678 switched the infusion, i.e., animals that received AP5 in the first five days, received saline for the  
679 second five days, and vice-versa.

680

681 **Sleep classification (Figure 4a; Supplemental Figure 7).** All neural data analyses were  
682 conducted using MATLAB 2019a (MathWorks) and functions from the EEGLAB  
683 (<http://sccn.ucsd.edu/eeglab/>) and Chronux (<http://chronux.org/>) toolboxes. Sleep was classified  
684 using cortical LFP signals and movement measured by video or EMG activity. LFP was  
685 preprocessed by artifact rejection, including manual rejection of noisy channels and z-scoring of  
686 each channel across the entire recording session. A mean LFP channel was then generated in M1  
687 for sleep classification by averaging across all M1 channels. This mean M1 LFP channel was then  
688 segmented into non-overlapping 10 second windows. In each window the power spectral density  
689 was computed using the Chronux function *mtspecgramc* and then averaged over the delta (1–4Hz)  
690 and theta (5-10Hz/2-15Hz) frequency bands. Both LFP power bands were then normalized by z-  
691 scoring. Epochs with high delta power ( $>0$  z-scored delta) and no movement were classified as  
692 NREM, epochs with high theta and low delta power ( $>0$  z-scored theta and  $<0$  z-scored delta) were  
693 classified as REM sleep, and other epochs were classified as wake (Watson, et al., 2016). All  
694 consecutive NREM or REM epochs that were less than 30 seconds long (3 consecutive epochs)  
695 were reclassified as wake.

696

697 **Assessing corticostriatal functional connectivity using LFP coherence (Figure 2; Figure 3).**

698 To measure corticostriatal functional connectivity across days, we measured LFP coherence during  
699 NREM across all M1 and DLS electrode pairs on each pre- and post-sleep session using chronux  
700 function *cohgramc*. For these analyses, we first applied common-mode referencing using the  
701 median signal, i.e., at every time-point, the median signal across all channels in a region was  
702 calculated and subtracted from every channel to decrease common noise and minimize volume  
703 conduction. Common-mode referencing was performed independently for the channels in each  
704 region, i.e., M1 and DLS. We classified “high coherence LFP pairs” as electrodes with a mean 4-  
705 8Hz coherence  $>0.6$ . To compare online changes in LFP coherence (from pre- to post-sleep on the  
706 same day) to offline changes in LFP coherence (from post-sleep on one day to pre-sleep on the  
707 next day), we computed a single value per pair for both online and offline coherence changes by  
708 averaging values across days of training.

709

710 **Predicting cross-area activity (Figure 3).** To assess cross-area dynamics, we first extracted low-  
711 dimensional representations of DLS activity by performing principal component analysis (PCA)  
712 on trial-averaged activity of DLS neurons time-locked to pellet touch and binned at 100ms,



713 specifically for time bins from five seconds before to five seconds after pellet touch. Principal  
714 components were computed using MATLAB function *pca*. Spiking activity from five seconds  
715 before to five seconds after pellet touch and binned at 100ms was then projected onto each of the  
716 first two components to generate low-dimensional neural trajectory representations of population  
717 activity in DLS. We then fit a linear regression model to predict DLS reach-related neural  
718 trajectories from one second before to one second after pellet touch from single unit spiking  
719 activity in M1. A separate model was used to predict each principle component, using MATLAB  
720 function *fitlm* and five-fold cross validation. For each time bin of the neural trajectory, the  
721 preceding 500ms of spiking activity for all M1 units, binned at 100ms, were used as predictors. A  
722 model was also fit on baseline, non-reaching, neural trajectories, calculated by projecting DLS  
723 spiking activity from five seconds to four second before pellet touch onto each of the first two  
724 computed principal components. The predictive ability of these models was assessed by  
725 calculating the correlation between the actual neural trajectories and the predicted trajectories.

726  
727 **NREM rhythm detection (Figure 4d).** The NREM rhythm detection applied here is based on an  
728 algorithm we have developed previously (Kim et al., 2019, Silversmith, et al., 2020). A mean LFP  
729 channel was generated in M1 for NREM rhythm classification by averaging across all channels  
730 (same as used for sleep classification). To detect sleep spindles, this mean signal was filtered in  
731 the spindle band (10 – 16 Hz) using a zero-phase shifted, third order Butterworth filter. A smoothed  
732 envelope was calculated by computing the magnitude of the Hilbert transform of this signal then  
733 convolving it with a Gaussian window. Next, we determined two upper thresholds for spindle  
734 detection based on the mean and standard deviation (s.d.) of the spindle band envelope during  
735 NREM. Epochs in which the spindle envelope exceeded 2.5 s.d. above the mean for at least one  
736 sample and the spindle power exceeded 1.5 s.d. above the mean for at least 500ms were detected  
737 as spindles. Then, spindles that were sufficiently close in time (<300 ms) were combined. To detect  
738 slow oscillations and delta waves, the mean M1 signal was filtered in a low frequency band (2<sup>nd</sup>  
739 order, zero phase shifted, high pass Butterworth filter with a cutoff at 0.1Hz followed by a 5<sup>th</sup>  
740 order, zero phase shifted, low pass Butterworth filter with a cutoff at 4Hz). Next, all positive-to-  
741 negative zero crossings during NREM were identified, along with the previous peaks, the  
742 following troughs, and the surrounding negative-to-positive zero crossings. Each identified epoch  
743 was considered a slow oscillation if the peak was in the top 15% of peaks, the trough was in the  
744 top 40% of troughs and the time between the negative-to-positive zero crossings was greater than  
745 300ms but did not exceed 1 second. Each identified epoch was considered a delta wave if the peak  
746 was in the bottom 85% of peaks, the trough was in the top 40% of troughs and the time between  
747 the negative-to-positive zero crossings was greater than 250ms.

748  
749 **Characterizing putatively monosynaptically connected M1 and DLS units (Figure 4b;  
750 Supplemental Figure 2b).** We characterized putatively monosynaptically connected pairs of M1  
751 and DLS units by calculating the cross correlation of spiking activity binned at 1ms during the first  
752 five minutes of NREM during pre- and post-sleep concatenated together (10 minutes total) on each  
753 day of training for each pair of M1 and DLS units. We then measured the mean value of the short-  
754 latency cross correlation for each pair (1-10ms time lag centered on DLS spiking; consistent with  
755 the conduction and synaptic delay between M1 and DLS; Koralek et al., 2013) and compared this  
756 value to a shuffled distribution generated by shuffling DLS spike time bins and recalculating the  
757 cross correlation 1,000 times. If the non-shuffled short-latency correlation magnitude was greater  
758 than 95% of the shuffled distribution values, we classified the pair of units as putatively connected.

759  
760 **Comparing corticostriatal transmission strength across behavioral states (Figure 4c;**  
761 **Supplemental Figure 3a&b).** To compare corticostriatal transmission strength across behavioral  
762 states, we generated a cross correlation of spiking activity binned at 1ms from each behavioral  
763 state (NREM, REM, and wake) for all putatively connected pairs of M1 and DLS units, during  
764 both pre- and post-sleep. To account for firing rate differences across states, each pair's cross  
765 correlation was normalized by subtracting the mean cross correlation values from 100-150ms time  
766 lag.

767  
768 **Comparing corticostriatal transmission strength across NREM rhythms (Figure 4g;**  
769 **Supplemental Figure 3c&d).** To compare corticostriatal transmission strength across NREM  
770 rhythms, we generated a cross correlation of spiking activity binned at 1ms from each NREM  
771 rhythm (sleep spindles, delta waves, and slow oscillations) for all putatively connected pairs of  
772 M1 and DLS units. Spiking during sleep spindles consisted of spiking during the one second  
773 centered on sleep spindle peak (-500ms to 500ms). Spiking during slow oscillations and delta  
774 waves consisted of spiking during the one second around upstate peak (-500ms to 500ms). To  
775 account for the influence of firing rate differences or changes in LFP-phase locking across NREM  
776 rhythms, we applied a normalization step we previously developed (Silversmith, et al., 2020).  
777 Briefly, we generated shuffled cross correlations between each M1 and DLS unit pair, with DLS  
778 spike times shuffled with respect to the NREM rhythm in which it fired. In this approach, both  
779 units maintain all their first-order relationships with the NREM rhythm; for example, the number  
780 of spikes, phase locking values, and phase preferences of individual units do not change after  
781 shuffling. However, the shuffling breaks the statistical relationship between the two neurons under  
782 examination. We repeated this shuffling 25 times and then subtracted the mean shuffled cross  
783 correlation from the unshuffled cross correlation.

784  
785 **NREM rhythm modulation (Figure 4e&f; Supplemental Figure 4).** To determine the sleep  
786 spindle modulation of individual M1 and DLS units, spiking during each sleep spindle was time  
787 locked to the peak of the filtered LFP and binned at 10ms. Spiking was averaged across sleep  
788 spindles and modulation was calculated by taking the minimum to maximal firing rate bin in the  
789 second around sleep spindle peak (-500ms to 500ms) divided by the minimum to maximal firing  
790 rate bin in a second long baseline period before each spindle (-1500ms to -500ms relative to spindle  
791 peak). To determine slow oscillation and delta wave modulation of individual M1 and DLS units,  
792 spiking during each slow oscillation or delta wave was time locked to the peak of the upstate and  
793 binned at 10ms. Spiking was averaged across slow oscillations or delta waves and modulation was  
794 calculated by taking the minimum to maximal firing rate bin in the second around upstate peak (-  
795 500ms to 500ms) divided by the minimum to maximal firing rate bin in a second long baseline  
796 period before each slow oscillation or delta wave (-1500ms to -500ms relative to upstate peak).

797  
798 **Characterizing reach modulated (RM) units (Figure 5; Supplemental Figure 5;**  
799 **Supplemental Figure 6).** To characterize M1 and DLS reach modulated units, we generated trial-  
800 averaged peri-event time histograms (PETHs) of spiking activity for individual units during  
801 reaching locked to pellet touch in 25ms bins, from 5 seconds before to 5 seconds after pellet touch  
802 (400 total bins). Each unit's PETH was then z-scored and reach modulation was measured by  
803 taking the sum of the absolute value of the time bins from 1 second before pellet touch to 1 second  
804 after pellet touch (80 total bins). We then generated a distribution of shuffled modulations by

805 shuffling all time bins and recalculating the modulation of the shuffled PETH and repeating this  
806 shuffling procedure one thousand times. Units with a non-shuffled modulation greater than the  
807 99% percentile of the shuffled distribution were considered significantly reach modulated.

808  
809 **Characterizing DLS units with strong or weak M1 reach modulated input (Figure 5e&f;**  
810 **Supplemental Figure 5e&f; Supplemental Figure 6e&f).** To characterize DLS units with strong  
811 or weak M1 reach modulated input, we calculated the number of reach modulated M1 units that  
812 were putatively connected to each DLS unit. If a DLS unit was connected to 3 or more reach  
813 modulated M1 units, we classified that DLS unit as having strong M1 reach modulated input, if a  
814 DLS unit was connected to 2 or less M1 reach modulated units, we classified that DLS unit as  
815 having weak or no M1 reach modulated input.

816  
817 **Measuring corticostriatal transmission strength changes within pre- and post-sleep (Figure**  
818 **6; Supplemental Figure 8).** To measure changes in corticostriatal transmission strength within  
819 pre- and post-sleep, we generated a cross correlation of spiking activity binned at 1ms from NREM  
820 activity during the first and second half of pre- and post-sleep. This was done for two populations  
821 of M1 and DLS unit pairs. The first population was all M1 and DLS unit pairs that contained a  
822 RM M1 unit, a DLS unit that was putatively connected to a RM M1 unit, and contained both M1  
823 and DLS units that were significantly modulated to sleep spindles. The second population was all  
824 M1 and DLS unit pairs that contained a RM M1 unit, a DLS unit that was putatively connected to  
825 a RM M1 unit, and contained M1 and DLS units that were both not significantly modulated to  
826 sleep spindles. To determine which units were modulated to sleep spindles, we generated peri-  
827 event time histograms (PETHs) of sleep spindle activity locked to spindle peak in 10ms bins from  
828 2 seconds before to 2 second after spindle peak (400 bins), averaged across all spindles. Sleep  
829 spindle modulation was then calculated by taking the minimum to maximal firing rate bin within  
830 the 1 second period centered on spindle peak (-500ms to 500ms). We then generated a distribution  
831 of shuffled modulations by shuffling the time bins and recalculating the modulation of this shuffled  
832 PETH. This shuffling procedure was repeated one thousand times to generate a distribution. Units  
833 with a non-shuffled modulation greater than the 99% percentile of the shuffled distribution were  
834 considered significantly sleep spindle modulated.

835  
836 **Sleep spindle and slow oscillation proximity (Figure 7).** Slow oscillation to sleep spindle  
837 proximity was determined by measuring the temporal proximity of the preceding slow oscillation  
838 zero-crossing (positive to negative LFP) to each sleep spindle peak. To determine the influence of  
839 slow oscillation proximity on sleep spindle modulation, we generated two PETHs locked to spindle  
840 peak and binned at 10ms for each unit. The first PETH was generated with sleep spindles that had  
841 a preceding slow oscillation within 500ms (“nested spindles”) and the second PETH was generated  
842 with sleep spindles that did not have a preceding slow oscillation within 500ms (“isolated  
843 spindles”). As there were more isolated spindles than nested spindles, the number of events used  
844 to generate each PETH was matched by randomly selecting isolated spindles to match the number  
845 of nested spindles. Modulation was then assessed by determining the peak firing rate bin in each  
846 PETH.

## Methods References

1. Wong, C. C., Ramanathan, D. S., Gulati, T., Won, S. J. & Ganguly, K. An automated behavioral box to assess forelimb function in rats. *J. Neurosci. Methods* 246, 30–7 (2015).
2. Mathis, A. et al. DeepLabCut: markerless pose estimation of user-defined body parts with deep learning. *Nat. Neurosci.* 21, 1281–1289 (2018).
3. Watson, B. O., Levenstein, D., Greene, J. P., Gelinas, J. N. & Buzsáki, G. Network Homeostasis and State Dynamics of Neocortical Sleep. *Neuron* 90, 839–852 (2016).
4. J, K., T, G. & K, G. Competing Roles of Slow Oscillations and Delta Waves in Memory Consolidation versus Forgetting. *Cell* 179, (2019).
5. Silversmith, D. B., Lemke, S. M., Egert, D., Berke, J. D. & Ganguly, K. The Degree of Nesting between Spindles and Slow Oscillations Modulates Neural Synchrony. *J. Neurosci.* 40, 4673–4684 (2020).
6. Koralek, A. C., Costa, R. M. & Carmena, J. M. Temporally Precise Cell-Specific Coherence Develops in Corticostriatal Networks during Learning. *Neuron* 79, 865–872 (2013).
